# Supplementary material
Source: PubMed Central journal article supplement (PMC4769200)
Supplement: ASN.2015010016_ASN2015010016SupplementaryData.pdf [file ASN.2015010016_ASN2015010016SupplementaryData.pdf]

## Supplemental figure 1

Flow chart of the study design: 1341 patients were included in Genkyst study between 2010 and January 2015, from which 973 were finally entered in the multivariate analysis. In addition to the 70 patients in whom the mutation was not identified, 298 patients were not entered in the final multivariate analysis either because they were under age 35 and had not developed hypertension and urological complications (n=128), either because of one or both of these clinical data were missing (n=170).

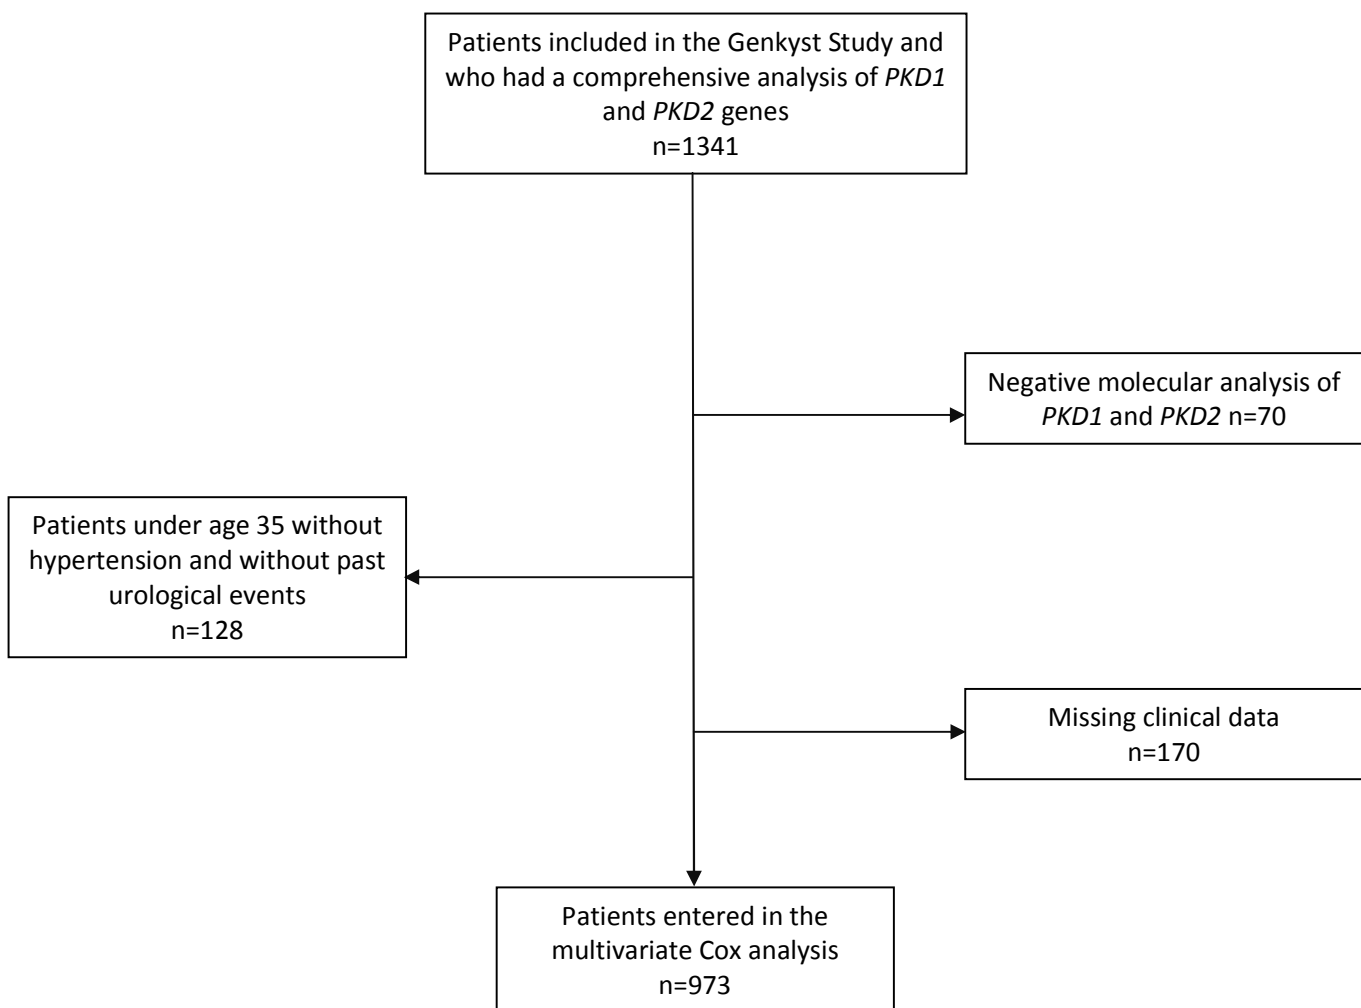

Supplemental figure 2

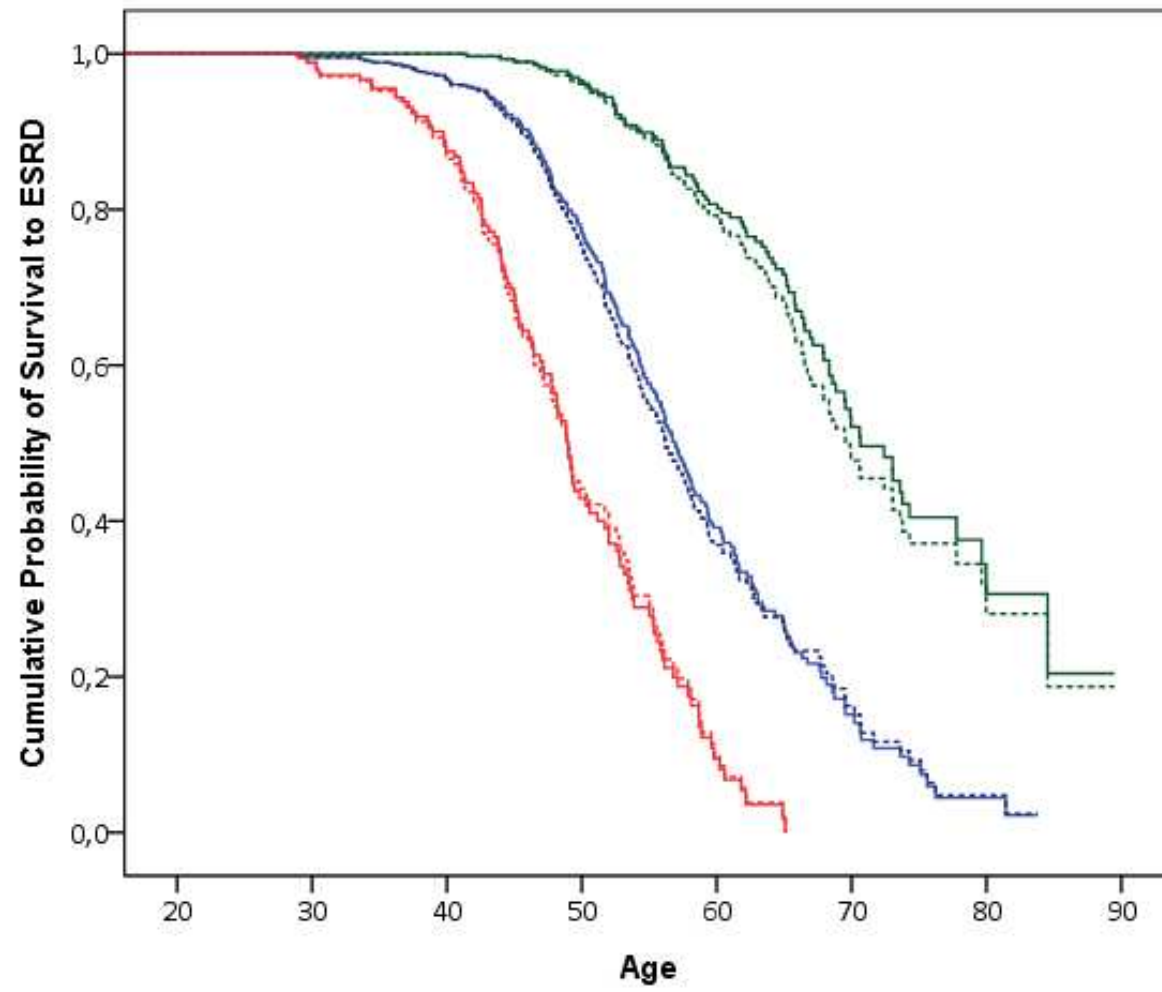

Comparison of renal survival curves in the three prognostic groups, low (green), intermediate (blue) and high (red) risk of progression to ESRD, in the developmental cohort (solid curves) and the 10 training data-set pooled together (dotted curves). Renal survival in the developmental cohort and the 10 training data-set pooled together did not differ.



**Supplemental Table 2**

**Performance characteristics of the PROPKD score for the additional cut-off points (or thresholds) of 1, 2, 4, 5, 7 and 8 (in complement to the main data presented in table 5) and for different censored ages. The test is positive when the score is greater than the cut-off point and negative when the score is less than or equal to the cut-off point (n=973 patients).**

| <b>Cut-off point</b> | <b>Censored age, years</b> | <b>Se (SE_Se) %</b> | <b>Sp (SE_Sp) %</b> | <b>PPV (SE_PPV)%</b> | <b>NPV (SE_NPV) %</b> |
|----------------------|----------------------------|---------------------|---------------------|----------------------|-----------------------|
| <b>1</b>             | 40                         | 100.0 (0.0)         | 16.9 (1.3)          | 4.5 (0.8)            | 100.0 (0.0)           |
|                      | 45                         | 10.00 (0.0)         | 18.4 (1.5)          | 11.8 (1.2)           | 100.0 (0.0)           |
|                      | 50                         | 100.0 (0.0)         | 22.7 (1.8)          | 26.6 (1.8)           | 100.0 (0.0)           |
|                      | 55                         | 97.7 (1.0)          | 27.0 (2.3)          | 42.7 (2.1)           | 95.5 (2.0)            |
|                      | 60                         | 96.4 (1.1)          | 34.6 (3.1)          | 60.2 (2.3)           | 90.6 (2.9)            |
|                      | 65                         | 95.0 (1.3)          | 44.5 (4.3)          | 72.6 (2.4)           | 85.2 (3.7)            |
| <b>2</b>             | 40                         | 100.0 (0.0)         | 28.2 (1.5)          | 5.2 (0.9)            | 100.0 (0)             |
|                      | 45                         | 97.5 (1.7)          | 29.9 (1.7)          | 13.2 (1.4)           | 99.1 (0.6)            |
|                      | 50                         | 96.3 (1.5)          | 34.1 (2.0)          | 29.0 (1.9)           | 97.1 (1.2)            |
|                      | 55                         | 92.4 (1.7)          | 39.6 (2.6)          | 46.0 (2.3)           | 90.3 (2.2)            |
|                      | 60                         | 90.8 (1.7)          | 50.6 (3.3)          | 65.4 (2.4)           | 84.3 (2.8)            |
|                      | 65                         | 87.4 (1.9)          | 58.4 (4.2)          | 76.5 (2.5)           | 75.0 (3.6)            |
| <b>4</b>             | 40                         | 94.4 (3.8)          | 56.2 (1.7)          | 7.9 (1.3)            | 99.6 (0.3)            |
|                      | 45                         | 87.8 (3.6)          | 59.5 (1.8)          | 19.1 (2.0)           | 97.8 (0.67)           |
|                      | 50                         | 78.2 (3.2)          | 65.5 (2.1)          | 38.8 (2.7)           | 91.5 (1.4)            |
|                      | 55                         | 70.7 (2.9)          | 71.3(2.4)           | 58.9 (2.9)           | 81.3 (2.0)            |
|                      | 60                         | 65.0 (2.7)          | 80.1 (2.6)          | 77.0 (2.8)           | 69.1 (2.5)            |
|                      | 65                         | 60.4 (2.4)          | 85.4 (3.0)          | 86.5 (2.7)           | 58.2 (2.9)            |
| <b>5</b>             | 40                         | 82.6 (6.4)          | 71.7 (1.5)          | 10.4 (1.8)           | 99.1 (0.4)            |
|                      | 45                         | 72.0 (5.0)          | 74.9 (1.6)          | 23.8 (2.7)           | 96.1 (0.8)            |
|                      | 50                         | 60.4 (3.8)          | 80.6 (1.7)          | 46.6 (3.4)           | 87.9 (1.4)            |
|                      | 55                         | 48.4 (3.1)          | 83.3 (2.0)          | 61.8 (3.6)           | 71.4 (2.0)            |
|                      | 60                         | 44.5 (2.7)          | 90.5 (1.9)          | 82.7 (3.2)           | 61.4 (2.4)            |
|                      | 65                         | 41.0 (2.6)          | 94.9 (1.9)          | 92.6 (2.6)           | 50.9 (2.6)            |

|          |    |            |             |             |            |
|----------|----|------------|-------------|-------------|------------|
| <b>7</b> | 40 | 28.3 (7.6) | 94.4 (0.8)  | 16.7 (4.8)  | 97.1 (0.6) |
|          | 45 | 22.2 (4.5) | 95.0 (0.8)  | 32.8 (6.3)  | 91.8 (1.0) |
|          | 50 | 16.2 (2.8) | 96.5 (0.8)  | 56.1 (7.3)  | 80.5 (1.5) |
|          | 55 | 13.0 (2.0) | 97.0 (0.9)  | 70.7 (7.1)  | 66.7 (1.9) |
|          | 60 | 11.5 (1.7) | 98.3 (0.9)  | 87.2 (5.8)  | 52.0 (2.1) |
|          | 65 | 10.4 (1.5) | 99.3 (0.7)  | 95.6 (4.2)  | 41.7 (2.2) |
| <b>8</b> | 40 | 14.0 (5.8) | 97.6 (0.5)  | 18.9 (7.7)  | 96.6 (0.6) |
|          | 45 | 10.5 (3.3) | 97.7 (0.6)  | 33.5 (9.3)  | 90.9 (1.0) |
|          | 50 | 7.2 (1.9)  | 98.3 (0.5)  | 54.7 (10.8) | 79.1 (1.5) |
|          | 55 | 6.6 (1.5)  | 98.9 (0.5)  | 77.2 (9.8)  | 65.5 (1.8) |
|          | 60 | 5.5 (1.2)  | 99.6 (0.4)  | 92.8 (6.8)  | 50.7 (2.1) |
|          | 65 | 4.9 (1.1)  | 100.0 (0.0) | 100.0 (0.0) | 40.4 (2.2) |

## Definitively pathogenic mutations

| Genkyst ID | Family ID | Gene | Exon/Intron | Nucleotide change       | Effect on Protein | Mutation type       | Reference             |
|------------|-----------|------|-------------|-------------------------|-------------------|---------------------|-----------------------|
| 020108     | PK11122   | PKD1 | 1           | c.(?_209)_(*1017_?)*del |                   | Large rearrangement | This study            |
| 080009     | PK10111   | PKD1 | 1           | c.(?_209)_(*1017_?)*del |                   | Large rearrangement | Audrezet, 2012        |
| 010883     | PK10111   | PKD1 | 1           | c.(?_209)_(*1017_?)*del |                   | Large rearrangement | Audrezet, 2012        |
| 031371     | PK10111   | PKD1 | 1           | c.(?_209)_(*1017_?)*del |                   | Large rearrangement | Audrezet, 2012        |
| 131045     | PK11248   | PKD1 | 1           | c.(?_209)_(*1201+?)*del |                   | Large rearrangement | This study            |
| 021266     | PK11032   | PKD1 | 1           | c.(?_209)_(*1201+?)*del |                   | Large rearrangement | This study            |
| 021367     | PK11032   | PKD1 | 1           | c.(?_209)_(*1201+?)*del |                   | Large rearrangement | This study            |
| 020138     | PK10350   | PKD1 | 1           | c.(?_209)_(*215+?)*del  |                   | Large rearrangement | Audrezet, 2012        |
| 020061     | PK10132   | PKD1 | 1           | c.107_108dup            | p.Cys37Profs*37   | Frameshift          | Rossetti, 2007        |
| 191709     | PK11379   | PKD1 | 1           | c.114del                | p.Cys39Alafs*34   | Frameshift          | This study            |
| 020083     | PK10412   | PKD1 | 1           | c.158_179del            | p.Gly53Valfs*13   | Frameshift          | Audrezet, 2012        |
| 020086     | PK10412   | PKD1 | 1           | c.158_179del            | p.Gly53Valfs*13   | Frameshift          | Audrezet, 2012        |
| 050019     | PK10975   | PKD1 | 1           | c.160_166dup            | p.Leu56Profs*60   | Frameshift          | This study            |
| 010176     | PK10164   | PKD1 | 1           | c.165_171del            | p.Leu56Argfs*15   | Frameshift          | Rossetti, 2007        |
| 060038     | PK11121   | PKD1 | 1           | c.-1933_215+3456del     |                   | Large rearrangement | This study            |
| 021104     | PK11121   | PKD1 | 1           | c.-1933_215+3456del     |                   | Large rearrangement | This study            |
| 030053     | PK10384   | PKD1 | 1           | c.2161G>C               |                   | Splicing            | Audrezet, 2012        |
| 091245     | PK11160   | PKD1 | 1           | c.74_75delinsT          | p.Gly25Valfs*48   | Frameshift          | This study            |
| 191555     | PK11315   | PKD1 | 1           | c.74del                 | p.Gly25Alafs*48   | Frameshift          | Hoefle, 2010          |
| 130044     | PK10592   | PKD1 | 2           | c.288-2A>G              |                   | Splicing            | Rossetti, 2001        |
| 131043     | PK10592   | PKD1 | 2           | c.288-2A>G              |                   | Splicing            | Rossetti, 2001        |
| 131048     | PK10592   | PKD1 | 2           | c.288-2A>G              |                   | Splicing            | Rossetti, 2001        |
| 021320     | PK10592   | PKD1 | 2           | c.288-2A>G              |                   | Splicing            | Rossetti, 2001        |
| 131398     | PK10592   | PKD1 | 2           | c.288-2A>G              |                   | Splicing            | Rossetti, 2001        |
| 131876     | PK10592   | PKD1 | 2           | c.288-2A>G              |                   | Splicing            | Rossetti, 2001        |
| 021201     | PK11126   | PKD1 | 3           | c.(?_288)_(*7863+?)*del |                   | Large rearrangement | This study            |
| 021119     | PK10856   | PKD1 | 3           | c.348_352del            | p.Asn116Lysfs*2   | Frameshift          | Garcia-Gonzales, 2007 |
| 191500     | PK11303   | PKD1 | 3           | c.359-2T>G              |                   | Splicing            | This study            |
| 030058     | PK11035   | PKD1 | 4           | c.360-131_4395del       |                   | Large rearrangement | This study            |
| 021206     | PK10928   | PKD1 | 4           | c.371_386dup            | p.Cys129Trpfs*5   | Frameshift          | This study            |
| 030040     | PK10322   | PKD1 | 4           | c.393_394del            | p.Cys131Trpfs*47  | Frameshift          | Audrezet, 2012        |
| 031300     | PK10322   | PKD1 | 4           | c.393_394del            | p.Cys131Trpfs*47  | Frameshift          | Audrezet, 2012        |
| 031026     | PK10767   | PKD1 | 4           | c.412C>T                | p.Arg138*         | nonsense            | Rossetti, 2007        |
| 031075     | PK10792   | PKD1 | 4           | c.412C>T                | p.Arg138*         | nonsense            | Rossetti, 2007        |
| 191725     | PK11387   | PKD1 | 5           | c.1029del               | p.Ala344Profs*121 | Frameshift          | This study            |
| 130043     | PK10591   | PKD1 | 5           | c.1111G>T               | p.Glu371*         | nonsense            | Audrezet, 2012        |
| 191716     | PK11386   | PKD1 | 5           | c.1202-1G>C             |                   | Splicing            | This study            |
| 100001     | PK10291   | PKD1 | 5           | c.617dup                | p.Pro207Alafs*54  | Frameshift          | Audrezet, 2012        |
| 040902     | PK10670   | PKD1 | 5           | c.618dup                | p.Pro207Alafs*54  | Frameshift          | This study            |
| 041528     | PK10670   | PKD1 | 5           | c.618dup                | p.Pro207Alafs*54  | Frameshift          | This study            |
| 030086     | PK10622   | PKD1 | 5           | c.661_701del            | p.Leu221Glyfs*26  | Frameshift          | Audrezet, 2012        |
| 031172     | PK10622   | PKD1 | 5           | c.661_701del            | p.Leu221Glyfs*26  | Frameshift          | Audrezet, 2012        |
| 021366     | PK11208   | PKD1 | 5           | c.696_697del            | p.Cys232Trpfs*28  | Frameshift          | This study            |
| 030803     | PK10590   | PKD1 | 5           | c.726dup                | p.Ala243Cysfs*18  | Frameshift          | This study            |
| 091019     | PK10967   | PKD1 | 5           | c.730dup                | p.Cys244Leufs*17  | Frameshift          | This study            |

|        |         |      |    |                          |                    |                     |                |
|--------|---------|------|----|--------------------------|--------------------|---------------------|----------------|
| 211818 | PK11483 | PKD1 | 5  | c.755dup                 | p-Pro253Alafs*8    | Frameshift          | Petola, 2005   |
| 211831 | PK11483 | PKD1 | 5  | c.755dup                 | p-Pro253Alafs*8    | Frameshift          | Petola, 2005   |
| 030078 | PK10463 | PKD1 | 5  | c.856_862del             | p.Gly287*          | Frameshift          | Audrezet, 2012 |
| 060006 | PK10588 | PKD1 | 5  | c.856_862del             | p.Gly287*          | Frameshift          | Audrezet, 2012 |
| 130013 | PK10643 | PKD1 | 5  | c.856_862del             | p.Gly287*          | Frameshift          | Audrezet, 2012 |
| 031177 | PK10892 | PKD1 | 5  | c.856_862del             | p.Gly287*          | Frameshift          | Audrezet, 2012 |
| 060024 | PK10588 | PKD1 | 5  | c.856_862del             | p.Gly287*          | Frameshift          | Audrezet, 2012 |
| 091414 | PK11207 | PKD1 | 5  | c.856_862del             | p.Gly287*          | Frameshift          | Audrezet, 2012 |
| 091595 | PK11390 | PKD1 | 5  | c.856_862del             | p.Gly287*          | Frameshift          | Audrezet, 2012 |
| 031085 | PK10807 | PKD1 | 5  | c.891dup                 | p.Leu298Alafs*73   | Frameshift          | This study     |
| 030974 | PK10901 | PKD1 | 5  | c.935_938dup             | p.Glu313Aspfs*59   | Frameshift          | This study     |
| 090831 | PK10683 | PKD1 | 6  | c.1291C>T                | p.Gln431*          | nonsense            | This study     |
| 191542 | PK11311 | PKD1 | 7  | c.1445del                | p.Pro482Argfs*76   | Frameshift          | This study     |
| 191776 | PK11440 | PKD1 | 7  | c.1495G>T                | p.Glu499*          | nonsense            | This study     |
| 020042 | PK10386 | PKD1 | 7  | c.1516G>T                | p.Glu506*          | nonsense            | Audrezet, 2012 |
| 020167 | PK10052 | PKD1 | 7  | c.1516G>T                | p.Glu506*          | nonsense            | Audrezet, 2012 |
| 021313 | PK10052 | PKD1 | 7  | c.1516G>T                | p.Glu506*          | nonsense            | Audrezet, 2012 |
| 021198 | PK10936 | PKD1 | 7  | c.1522_1541del           | p.Cys508Argfs*4    | Frameshift          | This study     |
| 020099 | PK10472 | PKD1 | 7  | c.1524C>A                | p.Cys508*          | nonsense            | Audrezet, 2012 |
| 021192 | PK10937 | PKD1 | 7  | c.1591G>T                | p.Glu531*          | nonsense            | This study     |
| 030033 | PK10287 | PKD1 | 7  | c.1606+2T>C              |                    | Splicing            | Audrezet, 2012 |
| 030057 | PK10407 | PKD1 | 8  | c.1609_1723-44del        | p.Pro537_Glu574del | In Frame deletion   | Audrezet, 2012 |
| 060956 | PK10938 | PKD1 | 8  | c.1615C>T                | p.Gln539*          | nonsense            | This study     |
| 030034 | PK10290 | PKD1 | 8  | c.1670del                | p.Leu557Argfs*27   | Frameshift          | Audrezet, 2012 |
| 030087 | PK10482 | PKD1 | 8  | c.1670del                | p.Leu557Argfs*27   | Frameshift          | Audrezet, 2012 |
| 031082 | PK10803 | PKD1 | 8  | c.1670del                | p.Leu557Argfs*27   | Frameshift          | Audrezet, 2012 |
| 031088 | PK10361 | PKD1 | 8  | c.1670del                | p.Leu557Argfs*27   | Frameshift          | Audrezet, 2012 |
| 031294 | PK10482 | PKD1 | 8  | c.1670del                | p.Leu557Argfs*27   | Frameshift          | Audrezet, 2012 |
| 030013 | PK10361 | PKD1 | 8  | c.1670del                | p.Leu557Argfs*27   | Frameshift          | Audrezet, 2012 |
| 021735 | PK11235 | PKD1 | 8  | c.1684C>T                | p.Gln562*          | nonsense            | Rossetti, 2007 |
| 010863 | PK10777 | PKD1 | 8  | c.1712_1722+17del        | p.Gln571Glyfs*12   | Frameshift          | This study     |
| 191481 | PK11264 | PKD1 | 8  | c.1722+1_1722-3delinsAGT |                    | Splicing            | This study     |
| 191546 | PK11264 | PKD1 | 8  | c.1722+1_1722+3delinsAGT |                    | Splicing            | This study     |
| 070912 | PK10229 | PKD1 | 8  | c.1722+1G>A              |                    | Splicing            | Audrezet, 2012 |
| 191768 | PK11451 | PKD1 | 9  | c.1751_1757del           | p.Ser584Lysfs*199  | Frameshift          | This study     |
| 020015 | PK10321 | PKD1 | 9  | c.1772del                | p.Thr591Argfs*194  | Frameshift          | Audrezet, 2012 |
| 131160 | PK11038 | PKD1 | 9  | c.1830C>G                | p.Tyr510*          | nonsense            | This study     |
| 031231 | PK11033 | PKD1 | 10 | c.1849-59_2805del        |                    | Large rearrangement | This study     |
| 020068 | PK10391 | PKD1 | 10 | c.1930G>T                | p.Gly644*          | nonsense            | Audrezet, 2012 |
| 021202 | PK10391 | PKD1 | 10 | c.1930G>T                | p.Gly644*          | nonsense            | Audrezet, 2012 |
| 021207 | PK10391 | PKD1 | 10 | c.1930G>T                | p.Gly644*          | nonsense            | Audrezet, 2012 |
| 020034 | PK10372 | PKD1 | 10 | c.2038del                | p.Tyr680Metfs*105  | Frameshift          | Audrezet, 2012 |
| 020126 | PK10522 | PKD1 | 10 | c.2089C>T                | p.Gln697*          | nonsense            | Audrezet, 2012 |
| 021114 | PK10908 | PKD1 | 10 | c.2097+2T>G              |                    | Splicing            | This study     |
| 020076 | PK10405 | PKD1 | 11 | c.2152C>T                | p.Gln718*          | nonsense            | Audrezet, 2012 |
| 030975 | PK10737 | PKD1 | 11 | c.2152C>T                | p.Gln718*          | nonsense            | Audrezet, 2012 |
| 021442 | PK11246 | PKD1 | 11 | c.2152C>T                | p.Gln718*          | nonsense            | Audrezet, 2012 |
| 191586 | PK10737 | PKD1 | 11 | c.2152C>T                | p.Gln718*          | nonsense            | Audrezet, 2012 |
| 191587 | PK10737 | PKD1 | 11 | c.2152C>T                | p.Gln718*          | nonsense            | Audrezet, 2012 |
| 070006 | PK10402 | PKD1 | 11 | c.2298_2308del           | p.Cys767Alafs*27   | Frameshift          | Hoelle, 2010   |
| 091418 | PK11297 | PKD1 | 11 | c.2326G>T                | p.Glu776*          | nonsense            | This study     |

|        |         |      |    |                               |                   |                     |                |
|--------|---------|------|----|-------------------------------|-------------------|---------------------|----------------|
| 191756 | PK11415 | PKD1 | 11 | c.2444_2445del                | p.Phe815*         | Frameshift          | This study     |
| 030806 | PK10602 | PKD1 | 11 | c.2487dup                     | p.Ala830Cysfs*42  | Frameshift          | Audrezet, 2012 |
| 191581 | PK11346 | PKD1 | 11 | c.2494dup                     | p.Arg852Profs*40  | Frameshift          | Rossetti, 2012 |
| 010070 | PK10230 | PKD1 | 11 | c.2636_2655dup                | p.Trp887Profs*18  | Frameshift          | Audrezet, 2012 |
| 010025 | PK10230 | PKD1 | 11 | c.2636_2655dup                | p.Trp887Profs*18  | Frameshift          | Audrezet, 2012 |
| 010062 | PK10230 | PKD1 | 11 | c.2636_2655dup                | p.Trp887Profs*18  | Frameshift          | Audrezet, 2012 |
| 010101 | PK10230 | PKD1 | 11 | c.2636_2655dup                | p.Trp887Profs*18  | Frameshift          | Audrezet, 2012 |
| 010003 | PK10230 | PKD1 | 11 | c.2636_2655dup                | p.Trp887Profs*18  | Frameshift          | Audrezet, 2012 |
| 010063 | PK10230 | PKD1 | 11 | c.2636_2655dup                | p.Trp887Profs*18  | Frameshift          | Audrezet, 2012 |
| 010045 | PK10230 | PKD1 | 11 | c.2636_2655dup                | p.Trp887Profs*18  | Frameshift          | Audrezet, 2012 |
| 010092 | PK10230 | PKD1 | 11 | c.2636_2655dup                | p.Trp887Profs*18  | Frameshift          | Audrezet, 2012 |
| 010061 | PK10230 | PKD1 | 11 | c.2636_2655dup                | p.Trp887Profs*18  | Frameshift          | Audrezet, 2012 |
| 010134 | PK10230 | PKD1 | 11 | c.2636_2655dup                | p.Trp887Profs*18  | Frameshift          | Audrezet, 2012 |
| 021056 | PK10761 | PKD1 | 11 | c.2636_2655dup                | p.Trp887Profs*18  | Frameshift          | Audrezet, 2012 |
| 021063 | PK10761 | PKD1 | 11 | c.2636_2655dup                | p.Trp887Profs*18  | Frameshift          | Audrezet, 2012 |
| 010899 | PK10230 | PKD1 | 11 | c.2636_2655dup                | p.Trp887Profs*18  | Frameshift          | Audrezet, 2012 |
| 090028 | PK10507 | PKD1 | 11 | c.2684_2685del                | p.Ser895Cysfs*9   | Frameshift          | Audrezet, 2012 |
| 020078 | PK10406 | PKD1 | 11 | c.2839C>T                     | p.Gln947*         | nonsense            | Audrezet, 2012 |
| 131303 | PK11137 | PKD1 | 11 | c.2853+1G>C                   |                   | Splicing            | This study     |
| 090012 | PK10375 | PKD1 | 11 | c.2854-1G>A                   |                   | Splicing            | Audrezet, 2012 |
| 090023 | PK10375 | PKD1 | 11 | c.2854-1G>A                   |                   | Splicing            | Audrezet, 2012 |
| 120001 | PK10563 | PKD1 | 11 | c.2854-1G>A                   |                   | Splicing            | Audrezet, 2012 |
| 150002 | PK10563 | PKD1 | 11 | c.2854-1G>A                   |                   | Splicing            | Audrezet, 2012 |
| 091348 | PK11219 | PKD1 | 11 | c.2854-1G>A                   |                   | Splicing            | Audrezet, 2012 |
| 130029 | PK10491 | PKD1 | 12 | c.2962_2963del                | p.Ser988Argfs*112 | Frameshift          | Audrezet, 2012 |
| 010054 | PK10028 | PKD1 | 12 | c.2968_2969delinsT            | p.Ala990Trpfs*7   | Frameshift          | Audrezet, 2012 |
| 010017 | PK10028 | PKD1 | 12 | c.2968_2969delinsT            | p.Ala990Trpfs*7   | Frameshift          | Audrezet, 2012 |
| 010066 | PK10028 | PKD1 | 12 | c.2968_2969delinsT            | p.Ala990Trpfs*7   | Frameshift          | Audrezet, 2012 |
| 010889 | PK10028 | PKD1 | 12 | c.2968_2969delinsT            | p.Ala990Trpfs*7   | Frameshift          | Audrezet, 2012 |
| 010019 | PK10035 | PKD1 | 12 | c.2985+1G>A                   |                   | Splicing            | Audrezet, 2012 |
| 010838 | PK10035 | PKD1 | 12 | c.2985+1G>A                   |                   | Splicing            | Audrezet, 2012 |
| 010842 | PK10035 | PKD1 | 12 | c.2985+1G>A                   |                   | Splicing            | Audrezet, 2012 |
| 010891 | PK10035 | PKD1 | 12 | c.2985+1G>A                   |                   | Splicing            | Audrezet, 2012 |
| 010893 | PK10035 | PKD1 | 12 | c.2985+1G>A                   |                   | Splicing            | Audrezet, 2012 |
| 010026 | PK10359 | PKD1 | 13 | c.2985+21_*1007delinsCACAGCTC |                   | Large rearrangement | Audrezet, 2012 |
| 010095 | PK10359 | PKD1 | 13 | c.2985+21_*1007delinsCACAGCTC |                   | Large rearrangement | Audrezet, 2012 |
| 031077 | PK11128 | PKD1 | 13 | c.2985+26_8161+37del          |                   | Large rearrangement | This study     |
| 010124 | PK10158 | PKD1 | 13 | c.3058C>T                     | p.Gln1020*        | nonsense            | Pelola, 2005   |
| 020009 | PK10309 | PKD1 | 13 | c.3058C>T                     | p.Gln1020*        | nonsense            | Pelola, 2005   |
| 020082 | PK10309 | PKD1 | 13 | c.3058C>T                     | p.Gln1020*        | nonsense            | Pelola, 2005   |
| 021197 | PK11006 | PKD1 | 13 | c.3058C>T                     | p.Gln1020*        | nonsense            | Pelola, 2005   |
| 130003 | PK10445 | PKD1 | 14 | c.3212_3245del                | p.Tyr1071Trpfs*72 | Frameshift          | Audrezet, 2012 |
| 030031 | PK10305 | PKD1 | 14 | c.3213C>G                     | p.Tyr1071*        | nonsense            | Audrezet, 2012 |
| 021205 | PK10305 | PKD1 | 14 | c.3213C>G                     | p.Tyr1071*        | nonsense            | Audrezet, 2012 |
| 021611 | PK11389 | PKD1 | 14 | c.3247dup                     | p.Ala1083Glnfs*18 | Frameshift          | This study     |
| 021319 | PK11091 | PKD1 | 14 | c.3285C>A                     | p.Tyr1095*        | nonsense            | Rossetti, 2007 |
| 020145 | PK10684 | PKD1 | 14 | c.3293del                     | p.Pro1098Glnfs*6  | Frameshift          | This study     |
| 021601 | PK10684 | PKD1 | 14 | c.3293del                     | p.Pro1098Glnfs*6  | Frameshift          | This study     |
| 010898 | PK11388 | PKD1 | 14 | c.3296-1G>T                   |                   | Splicing            | This study     |
| 031296 | PK11138 | PKD1 | 14 | c.3296-2A>C                   |                   | Splicing            | Tan, 2008      |
| 060952 | PK10672 | PKD1 | 15 | c.3319del                     | p.Ala1107Hisfs*8  | Frameshift          | This study     |



|        |         |      |    |                        |                      |                   |                       |
|--------|---------|------|----|------------------------|----------------------|-------------------|-----------------------|
| 060954 | PK10672 | PKD1 | 15 | c.3319del              | p.Ala1107Hisfs*8     | Frameshift        | This study            |
| 191504 | PK11304 | PKD1 | 15 | c.3423_3484del         | p.Arg1142Leufs*48    | Frameshift        | This study            |
| 100009 | PK10560 | PKD1 | 15 | c.3441C>G              | p.Tyr1147*           | nonsense          | Audrezet, 2012        |
| 031087 | PK10809 | PKD1 | 15 | c.3441C>G              | p.Tyr1147*           | nonsense          | Audrezet, 2012        |
| 030067 | PK10481 | PKD1 | 15 | c.3493del              | p.Asp1165Thrfs*6     | Frameshift        | Audrezet, 2012        |
| 031173 | PK10877 | PKD1 | 15 | c.3503del              | p.Pro1168Leufs*3     | Frameshift        | This study            |
| 031223 | PK10877 | PKD1 | 15 | c.3503del              | p.Pro1168Leufs*3     | Frameshift        | This study            |
| 091459 | PK11351 | PKD1 | 15 | c.3607C>T              | p.Gln1203*           | nonsense          | This study            |
| 030001 | PK10231 | PKD1 | 15 | c.3624_3645delinsT     | p.Phe1209_Leu1215del | In Frame deletion | Audrezet, 2012        |
| 040009 | PK10429 | PKD1 | 15 | c.3729G>A              | p.Trp1243*           | nonsense          | Audrezet, 2012        |
| 031089 | PK10810 | PKD1 | 15 | c.3761C>A              | p.Ser1254*           | nonsense          | This study            |
| 191517 | PK11287 | PKD1 | 15 | c.3812_3813del         | p.Thr1271Serfs*29    | Frameshift        | This study            |
| 191493 | PK11287 | PKD1 | 15 | c.3812_3813del         | p.Thr1271Serfs*29    | Frameshift        | This study            |
| 020103 | PK10479 | PKD1 | 15 | c.3907_3908del         | p.Ala1303Leufs*7     | Frameshift        | Audrezet, 2012        |
| 021199 | PK10479 | PKD1 | 15 | c.3907_3908del         | p.Ala1303Leufs*7     | Frameshift        | Audrezet, 2012        |
| 191571 | PK10595 | PKD1 | 15 | c.3920dup              | p.Gln1308Alafs*3     | Frameshift        | This study            |
| 031179 | PK10917 | PKD1 | 15 | c.3922C>T              | p.Gln1308*           | nonsense          | This study            |
| 090026 | PK10454 | PKD1 | 15 | c.3942_3969del         | p.Ala1315Thrfs*22    | Frameshift        | Audrezet, 2012        |
| 010059 | PK10029 | PKD1 | 15 | c.4135G>T              | p.Glu1379*           | nonsense          | Audrezet, 2012        |
| 010854 | PK10029 | PKD1 | 15 | c.4135G>T              | p.Glu1379*           | nonsense          | Audrezet, 2012        |
| 130036 | PK10547 | PKD1 | 15 | c.4198_4201del         | p.Leu1400Trpfs*31    | Frameshift        | Audrezet, 2012        |
| 020058 | PK10428 | PKD1 | 15 | c.4247_4248del         | p.Phe1416Trpfs*14    | Frameshift        | Audrezet, 2012        |
| 020107 | PK10483 | PKD1 | 15 | c.4255_4274delinsTGAGG | p.Glu1419*           | In Frame deletion | Audrezet, 2012        |
| 030062 | PK10452 | PKD1 | 15 | c.4297_4298insCACGT    | p.Phe1433Serfs*13    | Frameshift        | Audrezet, 2012        |
| 030809 | PK10582 | PKD1 | 15 | c.4297_4298insCACGT    | p.Phe1433Serfs*13    | Frameshift        | Audrezet, 2012        |
| 031072 | PK10582 | PKD1 | 15 | c.4297_4298insCACGT    | p.Phe1433Serfs*13    | Frameshift        | Audrezet, 2012        |
| 030100 | PK10545 | PKD1 | 15 | c.4306C>T              | p.Arg1436*           | nonsense          | Garcia-Gonzales, 2007 |
| 021619 | PK11370 | PKD1 | 15 | c.4306C>T              | p.Arg1436*           | nonsense          | Garcia-Gonzalez, 2007 |
| 060007 | PK10142 | PKD1 | 15 | c.4331_4332del         | p.Thr1444Serfs*12    | Frameshift        | Audrezet, 2012        |
| 060009 | PK10685 | PKD1 | 15 | c.4331_4332del         | p.Thr1444Serfs*12    | Frameshift        | Audrezet, 2012        |
| 020017 | PK10310 | PKD1 | 15 | c.4442dup              | p.Gln1482Alafs*41    | Frameshift        | Audrezet, 2012        |
| 020157 | PK10310 | PKD1 | 15 | c.4442dup              | p.Gln1482Alafs*41    | Frameshift        | Audrezet, 2012        |
| 021360 | PK10310 | PKD1 | 15 | c.4442dup              | p.Gln1482Alafs*41    | Frameshift        | Audrezet, 2012        |
| 021450 | PK10310 | PKD1 | 15 | c.4442dup              | p.Gln1482Alafs*41    | Frameshift        | Audrezet, 2012        |
| 021609 | PK10310 | PKD1 | 15 | c.4442dup              | p.Gln1482Alafs*41    | Frameshift        | Audrezet, 2012        |
| 021613 | PK10310 | PKD1 | 15 | c.4442dup              | p.Gln1482Alafs*41    | Frameshift        | Audrezet, 2012        |
| 021741 | PK10310 | PKD1 | 15 | c.4442dup              | p.Gln1482Alafs*41    | Frameshift        | Audrezet, 2012        |
| 010015 | PK10033 | PKD1 | 15 | c.4444C>T              | p.Gln1482*           | nonsense          | Audrezet, 2012        |
| 010078 | PK10208 | PKD1 | 15 | c.4444C>T              | p.Gln1482*           | nonsense          | Audrezet, 2012        |
| 010135 | PK10033 | PKD1 | 15 | c.4444C>T              | p.Gln1482*           | nonsense          | Audrezet, 2012        |
| 010136 | PK10033 | PKD1 | 15 | c.4444C>T              | p.Gln1482*           | nonsense          | Audrezet, 2012        |
| 010148 | PK10438 | PKD1 | 15 | c.4447C>T              | p.Gln1483*           | nonsense          | Hoefle, 2010          |
| 091411 | PK10438 | PKD1 | 15 | c.4447C>T              | p.Gln1483*           | nonsense          | Hoefle, 2010          |
| 010114 | PK10299 | PKD1 | 15 | c.4460_4461insA        | p.Phe1487Leufs*36    | Frameshift        | Audrezet, 2012        |
| 050008 | PK10456 | PKD1 | 15 | c.4551C>G              | p.Tyr1517*           | nonsense          | Audrezet, 2012        |
| 020140 | PK10721 | PKD1 | 15 | c.4551C>G              | p.Tyr1517*           | nonsense          | Audrezet, 2012        |
| 050011 | PK10790 | PKD1 | 15 | c.4551C>G              | p.Tyr1517*           | nonsense          | Audrezet, 2012        |
| 191720 | PK11369 | PKD1 | 15 | c.4580del              | p.Val1527Glyfs*7     | Frameshift        | This study            |
| 030003 | PK10295 | PKD1 | 15 | c.4617G>A              | p.Trp1539*           | nonsense          | Audrezet, 2012        |
| 030027 | PK10109 | PKD1 | 15 | c.4617G>A              | p.Trp1539*           | nonsense          | Audrezet, 2012        |
| 030037 | PK10121 | PKD1 | 15 | c.4617G>A              | p.Trp1539*           | nonsense          | Audrezet, 2012        |

|        |         |      |    |                |                      |                   |                         |
|--------|---------|------|----|----------------|----------------------|-------------------|-------------------------|
| 030050 | PK10295 | PKD1 | 15 | c.4617G>A      | p-Trp1539*           | noise             | Audrezet, 2012          |
| 030070 | PK10109 | PKD1 | 15 | c.4617G>A      | p-Trp1539*           | noise             | Audrezet, 2012          |
| 020120 | PK10121 | PKD1 | 15 | c.4617G>A      | p-Trp1539*           | noise             | Audrezet, 2012          |
| 030105 | PK10561 | PKD1 | 15 | c.4617G>A      | p-Trp1539*           | noise             | Audrezet, 2012          |
| 030111 | PK10573 | PKD1 | 15 | c.4617G>A      | p-Trp1539*           | noise             | Audrezet, 2012          |
| 020154 | PK10573 | PKD1 | 15 | c.4617G>A      | p-Trp1539*           | noise             | Audrezet, 2012          |
| 030978 | PK10573 | PKD1 | 15 | c.4617G>A      | p-Trp1539*           | noise             | Audrezet, 2012          |
| 031385 | PK10573 | PKD1 | 15 | c.4617G>A      | p-Trp1539*           | noise             | Audrezet, 2012          |
| 030022 | PK10121 | PKD1 | 15 | c.4617G>A      | p-Trp1539*           | noise             | Audrezet, 2012          |
| 021054 | PK10113 | PKD1 | 15 | c.4880_4881del | p-Tyr1627Cysfs*30    | Frameshift        | Audrezet, 2012          |
| 021058 | PK10178 | PKD1 | 15 | c.4881T>A      | p-Tyr1627*           | noise             | This study              |
| 010129 | PK10202 | PKD1 | 15 | c.4906C>T      | p-Gln1636*           | noise             | Rossetti, 2002          |
| 060011 | PK10141 | PKD1 | 15 | c.4906C>T      | p-Gln1636*           | noise             | Rossetti, 2002          |
| 060017 | PK10141 | PKD1 | 15 | c.4906C>T      | p-Gln1636*           | noise             | Rossetti, 2002          |
| 060937 | PK10141 | PKD1 | 15 | c.4906C>T      | p-Gln1636*           | noise             | Rossetti, 2002          |
| 091012 | PK10958 | PKD1 | 15 | c.4906C>T      | p-Gln1636*           | noise             | Rossetti, 2002          |
| 191754 | PK11368 | PKD1 | 15 | c.4924del      | p-Arg1642Alafs*80    | Frameshift        | This study              |
| 031090 | PK10839 | PKD1 | 15 | c.4929C>G      | p-Tyr1643*           | noise             | This study              |
| 020133 | PK10552 | PKD1 | 15 | c.4957C>T      | p-Gln1653*           | noise             | Phakdeekitcharoen, 2000 |
| 020134 | PK10552 | PKD1 | 15 | c.4957C>T      | p-Gln1653*           | noise             | Phakdeekitcharoen, 2000 |
| 010083 | PK10271 | PKD1 | 15 | c.4973_5006dup | p-Trp1669Tyrfs*12    | Frameshift        | Audrezet, 2012          |
| 010846 | PK10157 | PKD1 | 15 | c.5014_5015del | p-Arg1672Glyfs*98    | Frameshift        | Wamtek, 1999            |
| 010097 | PK10037 | PKD1 | 15 | c.5014_5015del | p-Arg1672Glyfs*98    | Frameshift        | Wamtek, 1999            |
| 010055 | PK10195 | PKD1 | 15 | c.5014_5015del | p-Arg1672Glyfs*98    | Frameshift        | Wamtek, 1999            |
| 010120 | PK10037 | PKD1 | 15 | c.5014_5015del | p-Arg1672Glyfs*98    | Frameshift        | Wamtek, 1999            |
| 010028 | PK10215 | PKD1 | 15 | c.5014_5015del | p-Arg1672Glyfs*98    | Frameshift        | Wamtek, 1999            |
| 020014 | PK10388 | PKD1 | 15 | c.5014_5015del | p-Arg1672Glyfs*98    | Frameshift        | Wamtek, 1999            |
| 020050 | PK10426 | PKD1 | 15 | c.5014_5015del | p-Arg1672Glyfs*98    | Frameshift        | Wamtek, 1999            |
| 020069 | PK10426 | PKD1 | 15 | c.5014_5015del | p-Arg1672Glyfs*98    | Frameshift        | Wamtek, 1999            |
| 031022 | PK10765 | PKD1 | 15 | c.5014_5015del | p-Arg1672Glyfs*98    | Frameshift        | Wamtek, 1999            |
| 021112 | PK10665 | PKD1 | 15 | c.5014_5015del | p-Arg1672Glyfs*98    | Frameshift        | Wamtek, 1999            |
| 021259 | PK10426 | PKD1 | 15 | c.5014_5015del | p-Arg1672Glyfs*98    | Frameshift        | Wamtek, 1999            |
| 021267 | PK10426 | PKD1 | 15 | c.5014_5015del | p-Arg1672Glyfs*98    | Frameshift        | Wamtek, 1999            |
| 021357 | PK11175 | PKD1 | 15 | c.5014_5015del | p-Arg1672Glyfs*98    | Frameshift        | Wamtek, 1999            |
| 031380 | PK11212 | PKD1 | 15 | c.5014_5015del | p-Arg1672Glyfs*98    | Frameshift        | Wamtek, 1999            |
| 191600 | PK11385 | PKD1 | 15 | c.5014_5015del | p-Arg1672Glyfs*98    | Frameshift        | Wamtek, 1999            |
| 191791 | PK11385 | PKD1 | 15 | c.5014_5015del | p-Arg1672Glyfs*98    | Frameshift        | Wamtek, 1999            |
| 191792 | PK11436 | PKD1 | 15 | c.5014_5015del | p-Arg1672Glyfs*98    | Frameshift        | Wamtek, 1999            |
| 191859 | PK11490 | PKD1 | 15 | c.5014_5015del | p-Arg1672Glyfs*98    | Frameshift        | Wamtek, 1999            |
| 192083 | PK11385 | PKD1 | 15 | c.5014_5015del | p-Arg1672Glyfs*98    | Frameshift        | Wamtek, 2003            |
| 021015 | PK10959 | PKD1 | 15 | c.5058dup      | p-Val1687Argfs*84    | Frameshift        | This study              |
| 021327 | PK11139 | PKD1 | 15 | c.5079C>A      | p-Tyr1693*           | noise             | Bataille, 2011          |
| 191714 | PK11383 | PKD1 | 15 | c.5079C>A      | p-Tyr1693*           | noise             | Bataille, 2011          |
| 040006 | PK10599 | PKD1 | 15 | c.5080_5103del | p-His1694_Asn1701del | In Frame deletion | Audrezet, 2012          |
| 040999 | PK10599 | PKD1 | 15 | c.5080_5103del | p-His1694_Asn1701del | In Frame deletion | Audrezet, 2012          |
| 031165 | PK10599 | PKD1 | 15 | c.5080_5103del | p-His1694_Asn1701del | In Frame deletion | Audrezet, 2012          |
| 031237 | PK10599 | PKD1 | 15 | c.5080_5103del | p-His1694_Asn1701del | In Frame deletion | Audrezet, 2012          |
| 041001 | PK10599 | PKD1 | 15 | c.5080_5103del | p-His1694_Asn1701del | In Frame deletion | Audrezet, 2012          |
| 010022 | PK10124 | PKD1 | 15 | c.5186del      | p-Pro1729Glnfs*30    | Frameshift        | Audrezet, 2012          |
| 010173 | PK10124 | PKD1 | 15 | c.5186del      | p-Pro1729Glnfs*30    | Frameshift        | Audrezet, 2012          |
| 010067 | PK10124 | PKD1 | 15 | c.5186del      | p-Pro1729Glnfs*30    | Frameshift        | Audrezet, 2012          |

|        |         |      |    |                    |                      |                   |                         |
|--------|---------|------|----|--------------------|----------------------|-------------------|-------------------------|
| 010069 | PK10124 | PKD1 | 15 | c.5186del          | p.Pro1729Glnfs*30    | Frameshift        | Audrezeit, 2012         |
| 100008 | PK10124 | PKD1 | 15 | c.5186del          | p.Pro1729Glnfs*30    | Frameshift        | Audrezeit, 2012         |
| 010089 | PK10118 | PKD1 | 15 | c.5242_5257del     | p.Val1748Profs*6     | Frameshift        | Audrezeit, 2012         |
| 020129 | PK10550 | PKD1 | 15 | c.5479_5480dup     | p.Gln1828Glyfs*9     | Frameshift        | Audrezeit, 2012         |
| 021430 | PK10550 | PKD1 | 15 | c.5479_5480dup     | p.Gln1828Glyfs*9     | Frameshift        | Audrezeit, 2012         |
| 010127 | PK10027 | PKD1 | 15 | c.5482C>T          | p.Gln1828*           | nonsense          | Rossetti, 2002          |
| 120010 | PK10515 | PKD1 | 15 | c.5515del          | p.Trp1839Glyfs*10    | Frameshift        | Audrezeit, 2012         |
| 021311 | PK11056 | PKD1 | 15 | c.5558_5559insT    | p.Met1854Hisfs*16    | Frameshift        | This study              |
| 191549 | PK11310 | PKD1 | 15 | c.5599_5600del     | p.Asn1867Cysfs*122   | Frameshift        | This study              |
| 010165 | PK10498 | PKD1 | 15 | c.5628_5629delinsC | p.Ala1877Profs*72    | Frameshift        | Audrezeit, 2012         |
| 010103 | PK10148 | PKD1 | 15 | c.5758del          | p.Arg1920Alafs*29    | Frameshift        | Audrezeit, 2012         |
| 010056 | PK10148 | PKD1 | 15 | c.5758del          | p.Arg1920Alafs*29    | Frameshift        | Audrezeit, 2012         |
| 021356 | PK11172 | PKD1 | 15 | c.5764C>T          | p.Gln1922*           | nonsense          | Thomas, 1999            |
| 020045 | PK10424 | PKD1 | 15 | c.5861dup          | p.Asn1954Lysfs*36    | Frameshift        | Audrezeit, 2012         |
| 131155 | PK10865 | PKD1 | 15 | c.5861dup          | p.Asn1954Lysfs*36    | Frameshift        | Audrezeit, 2012         |
| 021602 | PK11283 | PKD1 | 15 | c.5878C>T          | p.Gln1960*           | nonsense          | Phakdeekitchareon, 2000 |
| 191707 | PK11380 | PKD1 | 15 | c.5923C>T          | p.Gln1975*           | nonsense          | Bataille, 2011          |
| 191778 | PK11439 | PKD1 | 15 | c.5923C>T          | p.Gln1975*           | nonsense          | Bataille, 2011          |
| 021603 | PK11292 | PKD1 | 15 | c.5968_5969del     | p.Arg1990Glufs*59    | Frameshift        | This study              |
| 191506 | PK11291 | PKD1 | 15 | c.5968_5969del     | p.Arg1990Glufs*59    | Frameshift        | This study              |
| 191584 | PK11291 | PKD1 | 15 | c.5968_5969del     | p.Arg1990Glufs*59    | Frameshift        | This study              |
| 191578 | PK11291 | PKD1 | 15 | c.5968_5969del     | p.Arg1990Glufs*59    | Frameshift        | This study              |
| 191757 | PK11291 | PKD1 | 15 | c.5968_5969del     | p.Arg1990Glufs*59    | Frameshift        | This study              |
| 191781 | PK11291 | PKD1 | 15 | c.5968_5969del     | p.Arg1990Glufs*59    | Frameshift        | This study              |
| 191841 | PK11291 | PKD1 | 15 | c.5968_5969del     | p.Arg1990Glufs*59    | Frameshift        | This study              |
| 191848 | PK11291 | PKD1 | 15 | c.5968_5969del     | p.Arg1990Glufs*59    | Frameshift        | This study              |
| 191894 | PK11291 | PKD1 | 15 | c.5968_5969del     | p.Arg1990Glufs*59    | Frameshift        | This study              |
| 060032 | PK10520 | PKD1 | 15 | c.5969_6016del     | p.Asn1991_Trp2006del | In Frame deletion | Audrezeit, 2012         |
| 191866 | PK11486 | PKD1 | 15 | c.5982_5994del     | p.Arg1995Alafs*117   | Frameshift        | This study              |
| 191502 | PK10480 | PKD1 | 15 | c.6031C>T          | p.Gln2011*           | nonsense          | Audrezeit, 2012         |
| 010068 | PK10200 | PKD1 | 15 | c.6090del          | p.Val2031Trpfs*85    | Frameshift        | Audrezeit, 2012         |
| 090001 | PK10207 | PKD1 | 15 | c.6090del          | p.Val2031Trpfs*85    | Frameshift        | Audrezeit, 2012         |
| 040013 | PK10207 | PKD1 | 15 | c.6090del          | p.Val2031Trpfs*85    | Frameshift        | Audrezeit, 2012         |
| 030977 | PK10207 | PKD1 | 15 | c.6090del          | p.Val2031Trpfs*85    | Frameshift        | Audrezeit, 2012         |
| 111091 | PK10783 | PKD1 | 15 | c.6090del          | p.Val2031Trpfs*85    | Frameshift        | Audrezeit, 2012         |
| 010104 | PK10201 | PKD1 | 15 | c.6115C>T          | p.Gln2039*           | nonsense          | Phakdeekitchareon, 2000 |
| 091342 | PK10201 | PKD1 | 15 | c.6115C>T          | p.Gln2039*           | nonsense          | Phakdeekitchareon, 2000 |
| 010872 | PK11163 | PKD1 | 15 | c.6232C>T          | p.Gln2078*           | nonsense          | This study              |
| 191568 | PK11289 | PKD1 | 15 | c.6247_6259dup     | p.Pro2087Hisfs*25    | Frameshift        | This study              |
| 030092 | PK10601 | PKD1 | 15 | c.6307C>T          | p.Gln2103*           | nonsense          | Audrezeit, 2012         |
| 091452 | PK11245 | PKD1 | 15 | c.6319G>T          | p.Gln2107*           | nonsense          | This study              |
| 031168 | PK10867 | PKD1 | 15 | c.6344dup          | p.Arg2116Glufs*59    | Frameshift        | This study              |
| 191763 | PK11403 | PKD1 | 15 | c.6472C>T          | p.Gln2158*           | nonsense          | Rossetti, 2002          |
| 191851 | PK11488 | PKD1 | 15 | c.6472C>T          | p.Gln2158*           | nonsense          | Rossetti, 2002          |
| 010126 | PK10199 | PKD1 | 15 | c.6475_6476insCCCC | p.Val2159Alafs*17    | Frameshift        | Audrezeit, 2012         |
| 010007 | PK10199 | PKD1 | 15 | c.6475_6476insCCCC | p.Val2159Alafs*17    | Frameshift        | Audrezeit, 2012         |
| 010142 | PK10199 | PKD1 | 15 | c.6475_6476insCCCC | p.Val2159Alafs*17    | Frameshift        | Audrezeit, 2012         |
| 100005 | PK10199 | PKD1 | 15 | c.6475_6476insCCCC | p.Val2159Alafs*17    | Frameshift        | Audrezeit, 2012         |
| 100011 | PK10199 | PKD1 | 15 | c.6475_6476insCCCC | p.Val2159Alafs*17    | Frameshift        | Audrezeit, 2012         |
| 100003 | PK10199 | PKD1 | 15 | c.6475_6476insCCCC | p.Val2159Alafs*17    | Frameshift        | Audrezeit, 2012         |

|        |         |      |    |                    |                    |            |                         |
|--------|---------|------|----|--------------------|--------------------|------------|-------------------------|
| 041339 | PK11271 | PKD1 | 15 | c.6483dup          | p.Arg2162Alafs*13  | Frameshift | This study              |
| 010169 | PK10513 | PKD1 | 15 | c.6487C>T          | p.Arg2163*         | nonsense   | Rossetti, 2001          |
| 020143 | PK10666 | PKD1 | 15 | c.6487C>T          | p.Arg2163*         | nonsense   | Rossetti, 2001          |
| 021261 | PK10666 | PKD1 | 15 | c.6487C>T          | p.Arg2163*         | nonsense   | Rossetti, 2001          |
| 060020 | PK10453 | PKD1 | 15 | c.6543C>G          | p.Tyr2181*         | nonsense   | Audrezet, 2012          |
| 021189 | PK10872 | PKD1 | 15 | c.6574_6580del     | p.Thr2192Alafs*18  | Frameshift | Roelfsema, 1997         |
| 021111 | PK10769 | PKD1 | 15 | c.6577_6583del     | p.Cys2195Glyfs*15  | Frameshift | Audrezet, 2012          |
| 191503 | PK10769 | PKD1 | 15 | c.6577_6583del     | p.Cys2195Glyfs*15  | Frameshift | Audrezet, 2012          |
| 191721 | PK11366 | PKD1 | 15 | c.6720_6721del     | p.Leu2241Aspfs*20  | Frameshift | This study              |
| 191810 | PK11366 | PKD1 | 15 | c.6720_6721del     | p.Leu2241Aspfs*20  | Frameshift | This study              |
| 030009 | PK10270 | PKD1 | 15 | c.6726_6727del     | p.Gln2243Glufs*18  | Frameshift | Rossetti, 2001          |
| 030076 | PK10270 | PKD1 | 15 | c.6726_6727del     | p.Gln2243Glufs*18  | Frameshift | Rossetti, 2001          |
| 030059 | PK10514 | PKD1 | 15 | c.6730_6731del     | p.Ser2244Hisfs*17  | Frameshift | Yu, 2011                |
| 030074 | PK10516 | PKD1 | 15 | c.6730_6731del     | p.Ser2244Hisfs*17  | Frameshift | Yu, 2011                |
| 130049 | PK10514 | PKD1 | 15 | c.6730_6731del     | p.Ser2244Hisfs*17  | Frameshift | Yu, 2011                |
| 130045 | PK10598 | PKD1 | 15 | c.6799_6803dup     | p.Ser2269Cysfs*47  | Frameshift | Audrezet, 2012          |
| 021052 | PK10789 | PKD1 | 15 | c.6799_6803dup     | p.Ser2269Cysfs*47  | Frameshift | Audrezet, 2012          |
| 140010 | PK10985 | PKD1 | 15 | c.6799_6803dup     | p.Ser2269Cysfs*47  | Frameshift | Audrezet, 2012          |
| 050004 | PK10822 | PKD1 | 15 | c.6803G>A          | p.Trp2268*         | nonsense   | This study              |
| 010864 | PK10798 | PKD1 | 15 | c.6829_6845del     | p.Asp2277Argfs*137 | Frameshift | This study              |
| 010882 | PK10798 | PKD1 | 15 | c.6829_6845del     | p.Asp2277Argfs*137 | Frameshift | This study              |
| 030810 | PK10788 | PKD1 | 15 | c.6831del          | p.Asp2277Glufs*37  | Frameshift | This study              |
| 191511 | PK11288 | PKD1 | 15 | c.6831del          | p.Asp2277Glufs*37  | Frameshift | This study              |
| 061127 | PK11161 | PKD1 | 15 | c.6913C>T          | p.Gln2305*         | nonsense   | This study              |
| 191710 | PK11381 | PKD1 | 15 | c.6915+2T>C        |                    | Splicing   | This study              |
| 010110 | PK10112 | PKD1 | 15 | c.6915+2T>G        |                    | Splicing   | Perrichot, 2000         |
| 010099 | PK10112 | PKD1 | 15 | c.6915+2T>G        |                    | Splicing   | Perrichot, 2000         |
| 030971 | PK10112 | PKD1 | 15 | c.6915+2T>G        |                    | Splicing   | Perrichot, 2000         |
| 010858 | PK10112 | PKD1 | 15 | c.6915+2T>G        |                    | Splicing   | Perrichot, 2000         |
| 020098 | PK10478 | PKD1 | 16 | c.6994_7000del     | p.Ala2332Trpfs*7   | Frameshift | Phakdeekitchareon, 2000 |
| 020169 | PK10770 | PKD1 | 16 | c.6994_7000del     | p.Ala2332Trpfs*7   | Frameshift | Phakdeekitchareon, 2000 |
| 191501 | PK11290 | PKD1 | 16 | c.6994_7000del     | p.Ala2332Trpfs*7   | Frameshift | Phakdeekitchareon, 2000 |
| 091773 | PK11406 | PKD1 | 16 | c.6994_7000dup     | p.Val2334Glyfs*88  | Frameshift | Rossetti, 2001          |
| 010128 | PK10032 | PKD1 | 16 | c.7008C>A          | p.Tyr2336*         | nonsense   | Perrichot, 2000         |
| 120002 | PK10032 | PKD1 | 16 | c.7008C>A          | p.Tyr2336*         | nonsense   | Perrichot, 2000         |
| 021186 | PK10897 | PKD1 | 16 | c.7065+2_7065+4del |                    | Splicing   | This study              |
| 080001 | PK10346 | PKD1 | 16 | c.7066-2A>G        |                    | Splicing   | Audrezet, 2012          |
| 060938 | PK10878 | PKD1 | 17 | c.7112_7113insATA  | p.Ser2372*         | nonsense   | This study              |
| 191793 | PK11435 | PKD1 | 17 | c.7113_7114del     | p.Ser2372Leufs*47  | Frameshift | Rossetti, 2001          |
| 191547 | PK11309 | PKD1 | 17 | c.7126C>T          | p.Gln2376*         | nonsense   | This study              |
| 030063 | PK10411 | PKD1 | 17 | c.7137C>G          | p.Tyr2379*         | nonsense   | Audrezet, 2012          |
| 040016 | PK10411 | PKD1 | 17 | c.7137C>G          | p.Tyr2379*         | nonsense   | Audrezet, 2012          |
| 040018 | PK10411 | PKD1 | 17 | c.7137C>G          | p.Tyr2379*         | nonsense   | Audrezet, 2012          |
| 030075 | PK10411 | PKD1 | 17 | c.7137C>G          | p.Tyr2379*         | nonsense   | Audrezet, 2012          |
| 031029 | PK10411 | PKD1 | 17 | c.7137C>G          | p.Tyr2379*         | nonsense   | Audrezet, 2012          |
| 030108 | PK10562 | PKD1 | 17 | c.7158C>G          | p.Tyr2386*         | nonsense   | Audrezet, 2012          |
| 191509 | PK11312 | PKD1 | 17 | c.7204C>T          | p.Arg2402*         | nonsense   | Phakdeekitchareon, 2000 |
| 211834 | PK11470 | PKD1 | 17 | c.7209+1G>A        |                    | Splicing   | This study              |
| 020109 | PK10494 | PKD1 | 18 | c.7250del          | p.Leu2417Argfs*203 | Frameshift | Audrezet, 2012          |
| 030041 | PK10341 | PKD1 | 18 | c.7288C>T          | p.Arg2430*         | nonsense   | Phakdeekitchareon, 2000 |
| 020088 | PK10433 | PKD1 | 18 | c.7288C>T          | p.Arg2430*         | nonsense   | Phakdeekitchareon, 2000 |

|        |         |      |    |                      |                      |                     |                         |
|--------|---------|------|----|----------------------|----------------------|---------------------|-------------------------|
| 060027 | PK10484 | PKD1 | 18 | c.7288C>T            | p.Arg2430*           | nonsense            | Phakdeekitchareon, 2000 |
| 130015 | PK10493 | PKD1 | 18 | c.7288C>T            | p.Arg2430*           | nonsense            | Phakdeekitchareon, 2000 |
| 141037 | PK10823 | PKD1 | 18 | c.7288C>T            | p.Arg2430*           | nonsense            | Phakdeekitchareon, 2000 |
| 021053 | PK10814 | PKD1 | 18 | c.7288C>T            | p.Arg2430*           | nonsense            | Phakdeekitchareon, 2000 |
| 060002 | PK10816 | PKD1 | 18 | c.7288C>T            | p.Arg2430*           | nonsense            | Phakdeekitchareon, 2000 |
| 131041 | PK10493 | PKD1 | 18 | c.7288C>T            | p.Arg2430*           | nonsense            | Phakdeekitchareon, 2000 |
| 031288 | PK11063 | PKD1 | 18 | c.7288C>T            | p.Arg2430*           | nonsense            | Phakdeekitchareon, 2000 |
| 091420 | PK11234 | PKD1 | 18 | c.7288C>T            | p.Arg2430*           | nonsense            | Phakdeekitchareon, 2000 |
| 191715 | PK11384 | PKD1 | 18 | c.7288C>T            | p.Arg2430*           | nonsense            | Phakdeekitchareon, 2000 |
| 191803 | PK10823 | PKD1 | 18 | c.7288C>T            | p.Arg2430*           | nonsense            | Phakdeekitchareon, 2000 |
| 021351 | PK11167 | PKD1 | 18 | c.7318del            | p.Asp2440TTris*180   | Frameshift          | This study              |
| 010853 | PK10743 | PKD1 | 18 | c.7324_7342del       | p.Gln2442Seris*172   | Frameshift          | This study              |
| 021113 | PK10866 | PKD1 | 18 | c.7324_7344dup       | p.Gln2442_Leu2448dup | In Frame insertion  | This study              |
| 191769 | PK11404 | PKD1 | 18 | c.7390del            | p.Arg2464Alafs*156   | Frameshift          | This study              |
| 031235 | PK11030 | PKD1 | 19 | c.7642G>T            | p.Gln2548*           | nonsense            | This study              |
| 021358 | PK11174 | PKD1 | 19 | c.7648_7649del       | p.Gly2550Profs*44    | Frameshift          | This study              |
| 020039 | PK10381 | PKD1 | 19 | c.7672dup            | p.Gln2558Profs*37    | Frameshift          | Audrezet, 2012          |
| 020081 | PK10381 | PKD1 | 19 | c.7672dup            | p.Gln2558Profs*37    | Frameshift          | Audrezet, 2012          |
| 030006 | PK10272 | PKD1 | 19 | c.7703+1G>A          |                      | Splicing            | Audrezet, 2012          |
| 020041 | PK10387 | PKD1 | 20 | c.7730_7737del       | p.Pro2577Glnfs*15    | Frameshift          | Audrezet, 2012          |
| 020084 | PK10387 | PKD1 | 20 | c.7730_7737del       | p.Pro2577Glnfs*15    | Frameshift          | Audrezet, 2012          |
| 191808 | PK11468 | PKD1 | 20 | c.7804C>T            | p.Gln2602*           | nonsense            | Audrezet, 2012          |
| 020146 | PK10732 | PKD1 | 20 | c.7816C>T            | p.Gln2606*           | nonsense            | This study              |
| 191758 | PK11453 | PKD1 | 20 | c.7816C>T            | p.Gln2606*           | nonsense            | This study              |
| 010140 | PK10108 | PKD1 | 20 | c.7821_7825del       | p.Val2608Argfs*51    | Frameshift          | Audrezet, 2012          |
| 090049 | PK10108 | PKD1 | 20 | c.7821_7825del       | p.Val2608Argfs*51    | Frameshift          | Audrezet, 2012          |
| 010138 | PK10475 | PKD1 | 20 | c.7864+1G>T          |                      | Splicing            | Audrezet, 2012          |
| 020150 | PK11128 | PKD1 | 21 | c.7864-1J_18791+7del |                      | Large rearrangement | Audrezet, 2012          |
| 060015 | PK10422 | PKD1 | 21 | c.7866C>A            | p.Tyr2622*           | nonsense            | Audrezet, 2012          |
| 191565 | PK10422 | PKD1 | 21 | c.7866C>A            | p.Tyr2622*           | nonsense            | Audrezet, 2012          |
| 021324 | PK11090 | PKD1 | 21 | c.7903G>T            | p.Gln2635*           | nonsense            | This study              |
| 130008 | PK10432 | PKD1 | 21 | c.7915C>T            | p.Arg2639*           | nonsense            | Perrichot, 2000         |
| 140019 | PK10432 | PKD1 | 21 | c.7915C>T            | p.Arg2639*           | nonsense            | Perrichot, 2000         |
| 130028 | PK10432 | PKD1 | 21 | c.7915C>T            | p.Arg2639*           | nonsense            | Perrichot, 2000         |
| 020144 | PK10731 | PKD1 | 21 | c.7915C>T            | p.Arg2639*           | nonsense            | Perrichot, 2000         |
| 131399 | PK10432 | PKD1 | 21 | c.7915C>T            | p.Arg2639*           | nonsense            | Perrichot, 2000         |
| 191556 | PK11402 | PKD1 | 21 | c.7921C>T            | p.Gln2641*           | nonsense            | This study              |
| 021069 | PK10817 | PKD1 | 21 | c.7975del            | p.Asp2659Metfs*26    | Frameshift          | This study              |
| 030942 | PK10667 | PKD1 | 21 | c.8008C>T            | p.Gln2670*           | nonsense            | Audrezet, 2012          |
| 021263 | PK10667 | PKD1 | 21 | c.8008C>T            | p.Gln2670*           | nonsense            | Audrezet, 2012          |
| 031374 | PK10667 | PKD1 | 21 | c.8008C>T            | p.Gln2670*           | nonsense            | Audrezet, 2012          |
| 031475 | PK10667 | PKD1 | 21 | c.8008C>T            | p.Gln2670*           | nonsense            | Audrezet, 2012          |
| 010073 | PK10240 | PKD1 | 21 | c.8017-2_8017-1del   |                      | Splicing            | Rossetti, 2001          |
| 120006 | PK10240 | PKD1 | 21 | c.8017-2_8017-1del   |                      | Splicing            | Rossetti, 2001          |
| 100018 | PK10240 | PKD1 | 21 | c.8017-2_8017-1del   |                      | Splicing            | Rossetti, 2001          |
| 020132 | PK10549 | PKD1 | 21 | c.8017-2A>G          |                      | Splicing            | Rossetti, 2007          |
| 021426 | PK11236 | PKD1 | 21 | c.8017-2A>G          |                      | Splicing            | Rossetti, 2007          |
| 191548 | PK11308 | PKD1 | 21 | c.8017-2A>G          |                      | Splicing            | Rossetti, 2007          |
| 091884 | PK10089 | PKD1 | 22 | c.8056C>T            | p.Gln2686*           | nonsense            | Garcia-Gonzales, 2007   |
| 191717 | PK10089 | PKD1 | 22 | c.8070del            | p.Lys2690Asnfs*5     | Frameshift          | Audrezet, 2012          |
| 021610 | PK10966 | PKD1 | 23 | c.8196_8197dup       | p Ala2733Glyfs*24    | Frameshift          | This study              |

|        |         |      |    |                         |                      |                     |                         |
|--------|---------|------|----|-------------------------|----------------------|---------------------|-------------------------|
| 010859 | PK10766 | PKD1 | 23 | c.8219del               | p.Gly2740Glufs*16    | Frameshift          | This study              |
| 010851 | PK10025 | PKD1 | 23 | c.8257_8260del          | p.Tyr2753Thrfs*2     | Frameshift          | Audrezet, 2012          |
| 010008 | PK10025 | PKD1 | 23 | c.8257_8260del          | p.Tyr2753Thrfs*2     | Frameshift          | Audrezet, 2012          |
| 010158 | PK10025 | PKD1 | 23 | c.8257_8260del          | p.Tyr2753Thrfs*2     | Frameshift          | Audrezet, 2012          |
| 010852 | PK10025 | PKD1 | 23 | c.8257_8260del          | p.Tyr2753Thrfs*2     | Frameshift          | Audrezet, 2012          |
| 010862 | PK10025 | PKD1 | 23 | c.8257_8260del          | p.Tyr2753Thrfs*2     | Frameshift          | Audrezet, 2012          |
| 110021 | PK10855 | PKD1 | 23 | c.8284_8295del          | p.Ile2762_Arg2765del | In Frame deletion   | This study              |
| 110024 | PK10858 | PKD1 | 23 | c.8284_8295del          | p.Ile2762_Arg2765del | In Frame deletion   | This study              |
| 191801 | PK11419 | PKD1 | 23 | c.8284_8295del          | p.Ile2762_Arg2765del | In Frame deletion   | This study              |
| 061130 | PK10845 | PKD1 | 23 | c.8284_8295dup          | p.Ile2762_Arg2765dup | In Frame insertion  | This study              |
| 021193 | PK10845 | PKD1 | 23 | c.8284_8295dup          | p.Ile2762_Arg2765dup | In Frame insertion  | This study              |
| 021194 | PK10845 | PKD1 | 23 | c.8284_8295dup          | p.Ile2762_Arg2765dup | In Frame insertion  | This study              |
| 130025 | PK10466 | PKD1 | 23 | c.8308_8311delinsCTCGTT | p.Asn2770Leufs*6     | Frameshift          | Audrezet, 2012          |
| 130005 | PK10467 | PKD1 | 23 | c.8308_8311delinsCTCGTT | p.Asn2770Leufs*6     | Frameshift          | Audrezet, 2012          |
| 021190 | PK10875 | PKD1 | 23 | c.8308_8311delinsCTCGTT | p.Asn2770Leufs*6     | Frameshift          | Audrezet, 2012          |
| 091250 | PK10131 | PKD1 | 23 | c.8308_8311delinsCTCGTT | p.Asn2770Leufs*6     | Frameshift          | Audrezet, 2012          |
| 040022 | PK10500 | PKD1 | 23 | c.8320_8321del          | p.Leu2774Aspfs*47    | Frameshift          | Audrezet, 2012          |
| 030801 | PK10589 | PKD1 | 23 | c.8320_8321del          | p.Leu2774Aspfs*47    | Frameshift          | Audrezet, 2012          |
| 031281 | PK10589 | PKD1 | 23 | c.8320_8321del          | p.Leu2774Aspfs*47    | Frameshift          | Audrezet, 2012          |
| 041335 | PK10589 | PKD1 | 23 | c.8320_8321del          | p.Leu2774Aspfs*47    | Frameshift          | Audrezet, 2012          |
| 020071 | PK10423 | PKD1 | 23 | c.8350C>T               | p.Gln2784*           | nonsense            | Audrezet, 2012          |
| 111092 | PK10791 | PKD1 | 23 | c.8385C>A               | p.Cys2795*           | nonsense            | This study              |
| 010002 | PK10183 | PKD1 | 23 | c.8560C>T               | p.Gln2884*           | nonsense            | Audrezet, 2012          |
| 080003 | PK10030 | PKD1 | 23 | c.8560C>T               | p.Gln2884*           | nonsense            | Audrezet, 2012          |
| 021057 | PK10183 | PKD1 | 23 | c.8560C>T               | p.Gln2884*           | nonsense            | Audrezet, 2012          |
| 031083 | PK10808 | PKD1 | 23 | c.8560C>T               | p.Gln2884*           | nonsense            | Audrezet, 2012          |
| 010049 | PK10190 | PKD1 | 23 | c.8586del               | p.Ile2863Serfs*12    | Frameshift          | Audrezet, 2012          |
| 030107 | PK10190 | PKD1 | 23 | c.8586del               | p.Ile2863Serfs*12    | Frameshift          | Audrezet, 2012          |
| 060033 | PK10190 | PKD1 | 23 | c.8586del               | p.Ile2863Serfs*12    | Frameshift          | Audrezet, 2012          |
| 010894 | PK10190 | PKD1 | 23 | c.8586del               | p.Ile2863Serfs*12    | Frameshift          | Audrezet, 2012          |
| 010004 | PK10186 | PKD1 | 23 | c.8603C>A               | p.Ser2868*           | nonsense            | Audrezet, 2012          |
| 010843 | PK10186 | PKD1 | 23 | c.8603C>A               | p.Ser2868*           | nonsense            | Audrezet, 2012          |
| 131309 | PK11194 | PKD1 | 23 | c.8709_8713dup          | p.Val2905Alafs*91    | Frameshift          | This study              |
| 020139 | PK11125 | PKD1 | 24 | c.8791+89_9397+743del   | Large rearrangement  | Large rearrangement | This study              |
| 021200 | PK11125 | PKD1 | 24 | c.8791+89_9397+743del   | Large rearrangement  | Large rearrangement | This study              |
| 020079 | PK10431 | PKD1 | 24 | c.8799C>G               | p.Tyr2933*           | nonsense            | Audrezet, 2012          |
| 091349 | PK11230 | PKD1 | 24 | c.8830_8834del          | p.Val2944Profs*9     | Frameshift          | This study              |
| 030008 | PK10274 | PKD1 | 24 | c.8905C>T               | p.Gln2969*           | nonsense            | Inoue, 2002             |
| 030819 | PK10274 | PKD1 | 24 | c.8905C>T               | p.Gln2969*           | nonsense            | Inoue, 2002             |
| 021214 | PK10979 | PKD1 | 24 | c.8906del               | p.Gln2969Argfs*25    | Frameshift          | This study              |
| 090963 | PK10153 | PKD1 | 25 | c.8972dup               | p.Tyr2991*           | Frameshift          | Audrezet, 2012          |
| 191558 | PK11382 | PKD1 | 25 | c.8973C>G               | p.Tyr2991*           | nonsense            | Rossetti, 2002          |
| 020096 | PK10473 | PKD1 | 25 | c.9002G>A               | p.Trp3001*           | nonsense            | Phakdeekitchareon, 2000 |
| 020077 | PK10430 | PKD1 | 25 | c.9018_9035dup          | p.Val3008_Ser3013dup | In Frame insertion  | This study              |
| 010098 | PK10031 | PKD1 | 25 | c.9127del               | p.Cys3043Alafs*31    | Frameshift          | Audrezet, 2012          |
| 010088 | PK10031 | PKD1 | 25 | c.9127del               | p.Cys3043Alafs*31    | Frameshift          | Audrezet, 2012          |
| 010855 | PK10031 | PKD1 | 25 | c.9127del               | p.Cys3043Alafs*31    | Frameshift          | Audrezet, 2012          |
| 010856 | PK10031 | PKD1 | 25 | c.9127del               | p.Cys3043Alafs*31    | Frameshift          | Audrezet, 2012          |
| 030980 | PK10031 | PKD1 | 25 | c.9127del               | p.Cys3043Alafs*31    | Frameshift          | Audrezet, 2012          |
| 031174 | PK10876 | PKD1 | 25 | c.9148dup               | p.Ala3050Glyfs*19    | Frameshift          | Baraille, 2011          |
| 020043 | PK10374 | PKD1 | 25 | c.9201+1G>C             | Splicing             | Splicing            | Audrezet, 2012          |

|        |         |      |    |                        |                    |            |                      |
|--------|---------|------|----|------------------------|--------------------|------------|----------------------|
| 020137 | PK10587 | PKD1 | 26 | c.9214del              | p.Asp3072Metfs*2   | Frameshift | Audrezet, 2012       |
| 010847 | PK10012 | PKD1 | 26 | c.9240_9241del         | p.Ala3082Cysfs*96  | Frameshift | Thongrooprakun, 2004 |
| 020090 | PK10476 | PKD1 | 26 | c.9240_9241del         | p.Ala3082Cysfs*96  | Frameshift | Thongrooprakun, 2004 |
| 120015 | PK10012 | PKD1 | 26 | c.9240_9241del         | p.Ala3082Cysfs*96  | Frameshift | Thongrooprakun, 2004 |
| 021055 | PK10768 | PKD1 | 26 | c.9240_9241del         | p.Ala3082Cysfs*96  | Frameshift | Thongrooprakun, 2004 |
| 021215 | PK10768 | PKD1 | 26 | c.9240_9241del         | p.Ala3082Cysfs*96  | Frameshift | Thongrooprakun, 2004 |
| 141278 | PK11190 | PKD1 | 26 | c.9240_9241del         | p.Ala3082Cysfs*96  | Frameshift | Thongrooprakun, 2004 |
| 030004 | PK10276 | PKD1 | 26 | c.9283_9293del         | p.Leu3095Glyfs*80  | Frameshift | Audrezet, 2012       |
| 030068 | PK10443 | PKD1 | 26 | c.9317dup              | p.Arg3107Profs*72  | Frameshift | Audrezet, 2012       |
| 030069 | PK10443 | PKD1 | 26 | c.9317dup              | p.Arg3107Profs*72  | Frameshift | Audrezet, 2012       |
| 031071 | PK10443 | PKD1 | 26 | c.9317dup              | p.Arg3107Profs*72  | Frameshift | Audrezet, 2012       |
| 021353 | PK11141 | PKD1 | 26 | c.9398-1G>C            |                    | Splicing   | This study           |
| 010085 | PK10224 | PKD1 | 27 | c.9547C>T              | p.Arg3183*         | nonsense   | Audrezet, 2012       |
| 060019 | PK10224 | PKD1 | 27 | c.9547C>T              | p.Arg3183*         | nonsense   | Audrezet, 2012       |
| 060013 | PK10224 | PKD1 | 27 | c.9547C>T              | p.Arg3183*         | nonsense   | Audrezet, 2012       |
| 020106 | PK10527 | PKD1 | 27 | c.9547C>T              | p.Arg3183*         | nonsense   | Audrezet, 2012       |
| 060022 | PK10224 | PKD1 | 27 | c.9547C>T              | p.Arg3183*         | nonsense   | Audrezet, 2012       |
| 050001 | PK10224 | PKD1 | 27 | c.9547C>T              | p.Arg3183*         | nonsense   | Audrezet, 2012       |
| 021361 | PK11176 | PKD1 | 27 | c.9547C>T              | p.Arg3183*         | nonsense   | Audrezet, 2012       |
| 020060 | PK10414 | PKD1 | 27 | c.9547del              | p.Arg3183Glnfs*133 | Frameshift | Audrezet, 2012       |
| 010038 | PK10140 | PKD1 | 27 | c.9555G>A              | p.Trp3185*         | nonsense   | Audrezet, 2012       |
| 010895 | PK10140 | PKD1 | 27 | c.9555G>A              | p.Trp3185*         | nonsense   | Audrezet, 2012       |
| 010034 | PK10239 | PKD1 | 27 | c.9555G>A              | p.Trp3185*         | nonsense   | Audrezet, 2012       |
| 010032 | PK10140 | PKD1 | 27 | c.9555G>A              | p.Trp3185*         | nonsense   | Audrezet, 2012       |
| 010016 | PK10140 | PKD1 | 27 | c.9555G>A              | p.Trp3185*         | nonsense   | Audrezet, 2012       |
| 030065 | PK10143 | PKD1 | 28 | c.9616C>T              | p.Gln3206*         | nonsense   | Perrichot, 2000      |
| 130020 | PK10143 | PKD1 | 28 | c.9616C>T              | p.Gln3206*         | nonsense   | Perrichot, 2000      |
| 030024 | PK10143 | PKD1 | 28 | c.9616C>T              | p.Gln3206*         | nonsense   | Perrichot, 2000      |
| 130039 | PK10143 | PKD1 | 28 | c.9616C>T              | p.Gln3206*         | nonsense   | Perrichot, 2000      |
| 030813 | PK10143 | PKD1 | 28 | c.9616C>T              | p.Gln3206*         | nonsense   | Perrichot, 2000      |
| 131880 | PK10143 | PKD1 | 28 | c.9616C>T              | p.Gln3206*         | nonsense   | Perrichot, 2000      |
| 050002 | PK10503 | PKD1 | 28 | c.9668del              | p.Ser320Argfs*96   | Frameshift | Perrichot, 2000      |
| 191770 | PK11450 | PKD1 | 29 | c.9788G>A              | p.Trp3263*         | nonsense   | This study           |
| 191588 | PK11378 | PKD1 | 31 | c.10073del             | p.Thr3358Asnfs*39  | Frameshift | This study           |
| 030946 | PK10722 | PKD1 | 31 | c.10151C>G             | p.Ser3384*         | nonsense   | Petola, 2005         |
| 140006 | PK10523 | PKD1 | 31 | c.10167+25_10167+43del |                    | Splicing   | Peral, 1997          |
| 021317 | PK11253 | PKD1 | 31 | c.10167+25_10167+43del |                    | Splicing   | Peral, 1997          |
| 091413 | PK11252 | PKD1 | 31 | c.10167+25_10167+43del |                    | Splicing   | Peral, 1997          |
| 021424 | PK11253 | PKD1 | 31 | c.10167+25_10167+43del |                    | Splicing   | Peral, 1997          |
| 021184 | PK10910 | PKD1 | 32 | c.10189_10190del       | p.Lys3397Glnfs*2   | Frameshift | This study           |
| 191564 | PK11313 | PKD1 | 32 | c.10215dup             | p.Lys3406*         | Frameshift | This study           |
| 191580 | PK11313 | PKD1 | 32 | c.10215dup             | p.Lys3406*         | Frameshift | This study           |
| 031295 | PK11116 | PKD1 | 33 | c.10232G>A             | p.Trp3411*         | nonsense   | This study           |
| 020070 | PK10415 | PKD1 | 33 | c.10335del             | p.Leu3446Trpfs*27  | Frameshift | Audrezet, 2012       |
| 020119 | PK10541 | PKD1 | 33 | c.10345_10406-24del    | p.Gln3449Metfs*4   | Frameshift | Audrezet, 2012       |
| 020162 | PK10541 | PKD1 | 33 | c.10345_10406-24del    | p.Gln3449Metfs*4   | Frameshift | Audrezet, 2012       |
| 020005 | PK10306 | PKD1 | 33 | c.10374dup             | p.Tyr3459Leufs*12  | Frameshift | Audrezet, 2012       |
| 020100 | PK10306 | PKD1 | 33 | c.10374dup             | p.Tyr3459Leufs*12  | Frameshift | Audrezet, 2012       |
| 030093 | PK10605 | PKD1 | 33 | c.10405+1G>T           |                    | Splicing   | Audrezet, 2012       |
| 040905 | PK10147 | PKD1 | 34 | c.10423C>T             | p.Gln3475*         | nonsense   | Perrichot, 1999      |
| 041000 | PK10147 | PKD1 | 34 | c.10423C>T             | p.Gln3475*         | nonsense   | Perrichot, 1999      |

|        |         |      |    |                       |                    |            |                 |
|--------|---------|------|----|-----------------------|--------------------|------------|-----------------|
| 020075 | PK10450 | PKD1 | 34 | c.10440_10441dup      | p.Val3481Glyfs*47  | Frameshift | Audrezeit, 2012 |
| 021196 | PK10450 | PKD1 | 34 | c.10440_10441dup      | p.Val3481Glyfs*47  | Frameshift | Audrezeit, 2012 |
| 021329 | PK10450 | PKD1 | 34 | c.10440_10441dup      | p.Val3481Glyfs*47  | Frameshift | Audrezeit, 2012 |
| 060041 | PK10644 | PKD1 | 34 | c.10441dup            | p.Val3481Glyfs*146 | Frameshift | Audrezeit, 2012 |
| 020156 | PK11018 | PKD1 | 35 | c.10519A>T            | p.Lys3507*         | nonsense   | This study      |
| 020166 | PK11018 | PKD1 | 35 | c.10519A>T            | p.Lys3507*         | nonsense   | This study      |
| 021253 | PK11018 | PKD1 | 35 | c.10519A>T            | p.Lys3507*         | nonsense   | This study      |
| 040014 | PK10355 | PKD1 | 35 | c.10540C>T            | p.Gln3514*         | nonsense   | Peral, 1996     |
| 021606 | PK11317 | PKD1 | 35 | c.10563_10570del      | p.Pro3522Argfs*102 | Frameshift | This study      |
| 020104 | PK10504 | PKD1 | 35 | c.10618+2T>C          |                    | Splicing   | Audrezeit, 2012 |
| 020142 | PK10504 | PKD1 | 35 | c.10618+2T>C          |                    | Splicing   | Audrezeit, 2012 |
| 211812 | PK11434 | PKD1 | 35 | c.10618+2T>C          |                    | Splicing   | Audrezeit, 2012 |
| 020089 | PK10455 | PKD1 | 36 | c.10701_10720del      | p.Ala3569Glyfs*51  | Frameshift | Audrezeit, 2012 |
| 010145 | PK10409 | PKD1 | 36 | c.10722_10732del      | p.Trp3575Glnfs*48  | Frameshift | Audrezeit, 2012 |
| 020170 | PK10813 | PKD1 | 36 | c.10725G>A            | p.Trp3575*         | nonsense   | Zang, 2005      |
| 010850 | PK10686 | PKD1 | 36 | c.10728_10731dup      | p.Ala3578Glyfs*50  | Frameshift | This study      |
| 021257 | PK11037 | PKD1 | 36 | c.10730del            | p.Gly3577Valfs*8   | Frameshift | This study      |
| 191566 | PK11280 | PKD1 | 36 | c.10739del            | p.Phe3580Serfs*5   | Frameshift | This study      |
| 020013 | PK10323 | PKD1 | 36 | c.10745dup            | p.Val3584Argfs*43  | Frameshift | Audrezeit, 2012 |
| 020122 | PK10323 | PKD1 | 36 | c.10745dup            | p.Val3584Argfs*43  | Frameshift | Audrezeit, 2012 |
| 030090 | PK10659 | PKD1 | 36 | c.10745dup            | p.Val3584Argfs*43  | Frameshift | Audrezeit, 2012 |
| 141038 | PK10835 | PKD1 | 36 | c.10745dup            | p.Val3584Argfs*43  | Frameshift | Audrezeit, 2012 |
| 010036 | PK10078 | PKD1 | 36 | c.10789del            | p.Leu3597Trpfs*10  | Frameshift | Audrezeit, 2012 |
| 010115 | PK10078 | PKD1 | 36 | c.10789del            | p.Leu3597Trpfs*10  | Frameshift | Audrezeit, 2012 |
| 031178 | PK10921 | PKD1 | 36 | c.10821+IG>A          |                    | Splicing   | This study      |
| 191543 | PK11281 | PKD1 | 36 | c.10821+IG>A          |                    | Splicing   | This study      |
| 191569 | PK11281 | PKD1 | 36 | c.10821+IG>A          |                    | Splicing   | This study      |
| 191755 | PK11416 | PKD1 | 36 | c.10821+IG>A          |                    | Splicing   | This study      |
| 020037 | PK10340 | PKD1 | 37 | c.10833del            | p.Ala3612Profs*20  | Frameshift | Audrezeit, 2012 |
| 020124 | PK10340 | PKD1 | 37 | c.10833del            | p.Ala3612Profs*20  | Frameshift | Audrezeit, 2012 |
| 010125 | PK10162 | PKD1 | 37 | c.10897_10898del      | p.Ser3633Profs*88  | Frameshift | Audrezeit, 2012 |
| 191572 | PK11318 | PKD1 | 37 | c.10949_10950dup      | p.Gly3651Thrfs*34  | Frameshift | This study      |
| 100992 | PK11024 | PKD1 | 37 | c.10964_10965delinsAA | p.Phe3655*         | nonsense   | This study      |
| 010023 | PK10034 | PKD1 | 37 | c.10966del            | p.Leu3656Trpfs*28  | Frameshift | Audrezeit, 2012 |
| 010075 | PK10155 | PKD1 | 37 | c.11004dup            | p.Gly3669Trpfs*53  | Frameshift | Audrezeit, 2012 |
| 030061 | PK10005 | PKD1 | 37 | c.11016+IG>A          |                    | Splicing   | Audrezeit, 2012 |
| 030071 | PK10497 | PKD1 | 37 | c.11016+IG>A          |                    | Splicing   | Audrezeit, 2012 |
| 030095 | PK10005 | PKD1 | 37 | c.11016+IG>A          |                    | Splicing   | Audrezeit, 2012 |
| 031162 | PK10836 | PKD1 | 37 | c.11016+IG>A          |                    | Splicing   | Audrezeit, 2012 |
| 031180 | PK10836 | PKD1 | 37 | c.11016+IG>A          |                    | Splicing   | Audrezeit, 2012 |
| 031383 | PK10836 | PKD1 | 37 | c.11016+IG>A          |                    | Splicing   | Audrezeit, 2012 |
| 031384 | PK10005 | PKD1 | 37 | c.11016+IG>A          |                    | Splicing   | Audrezeit, 2012 |
| 091453 | PK10836 | PKD1 | 37 | c.11016+IG>A          |                    | Splicing   | Audrezeit, 2012 |
| 191513 | PK11265 | PKD1 | 37 | c.11017-IG>C          |                    | Splicing   | This study      |
| 090967 | PK10700 | PKD1 | 38 | c.11078C>A            | p.Ser3693*         | nonsense   | This study      |
| 010060 | PK10146 | PKD1 | 38 | c.11078dup            | p.Cys3694Metfs*28  | Frameshift | Perrichot, 1999 |
| 010072 | PK10146 | PKD1 | 38 | c.11078dup            | p.Cys3694Metfs*28  | Frameshift | Perrichot, 1999 |
| 010077 | PK10059 | PKD1 | 38 | c.11078dup            | p.Cys3694Metfs*28  | Frameshift | Perrichot, 1999 |
| 010018 | PK10059 | PKD1 | 38 | c.11078dup            | p.Cys3694Metfs*28  | Frameshift | Perrichot, 1999 |
| 010011 | PK10059 | PKD1 | 38 | c.11078dup            | p.Cys3694Metfs*28  | Frameshift | Perrichot, 1999 |
| 010040 | PK10059 | PKD1 | 38 | c.11078dup            | p.Cys3694Metfs*28  | Frameshift | Perrichot, 1999 |



|        |         |      |    |                    |                      |                   |                 |
|--------|---------|------|----|--------------------|----------------------|-------------------|-----------------|
| 010030 | PK10059 | PKD1 | 38 | c.11078dup         | p.Cys3694Metfs*28    | Frameshift        | Perrichot, 1999 |
| 010081 | PK10059 | PKD1 | 38 | c.11078dup         | p.Cys3694Metfs*28    | Frameshift        | Perrichot, 1999 |
| 010074 | PK10146 | PKD1 | 38 | c.11078dup         | p.Cys3694Metfs*28    | Frameshift        | Perrichot, 1999 |
| 010116 | PK10059 | PKD1 | 38 | c.11078dup         | p.Cys3694Metfs*28    | Frameshift        | Perrichot, 1999 |
| 010122 | PK10059 | PKD1 | 38 | c.11078dup         | p.Cys3694Metfs*28    | Frameshift        | Perrichot, 1999 |
| 010106 | PK10059 | PKD1 | 38 | c.11078dup         | p.Cys3694Metfs*28    | Frameshift        | Perrichot, 1999 |
| 010159 | PK10059 | PKD1 | 38 | c.11078dup         | p.Cys3694Metfs*28    | Frameshift        | Perrichot, 1999 |
| 100015 | PK10059 | PKD1 | 38 | c.11078dup         | p.Cys3694Metfs*28    | Frameshift        | Perrichot, 1999 |
| 100016 | PK10059 | PKD1 | 38 | c.11078dup         | p.Cys3694Metfs*28    | Frameshift        | Perrichot, 1999 |
| 010870 | PK10891 | PKD1 | 38 | c.11078dup         | p.Cys3694Metfs*28    | Frameshift        | Perrichot, 1999 |
| 010879 | PK10891 | PKD1 | 38 | c.11078dup         | p.Cys3694Metfs*28    | Frameshift        | Perrichot, 1999 |
| 010885 | PK10891 | PKD1 | 38 | c.11078dup         | p.Cys3694Metfs*28    | Frameshift        | Perrichot, 1999 |
| 030106 | PK10618 | PKD1 | 38 | c.11091del         | p.His697Glnfs*129    | Frameshift        | Audrezet, 2012  |
| 191577 | PK11305 | PKD1 | 39 | c.11177G>A         | p.Trp3726*           | non sense         | This study      |
| 030973 | PK10729 | PKD1 | 39 | c.11178dup         | p.Met3727Aspfs*89    | Frameshift        | This study      |
| 030023 | PK11505 | PKD1 | 39 | c.11202>A          | p.Tyr3734*           | non sense         | This study      |
| 191573 | PK11306 | PKD1 | 39 | c.11270-1G>T       |                      | Splicing          | Kumar, 2012     |
| 110014 | PK10634 | PKD1 | 40 | c.11296delinsCG    | p.Val3767Glyfs*49    | Frameshift        | Audrezet, 2012  |
| 191807 | PK11545 | PKD1 | 40 | c.11314_11324del   | p.Ala3772Leufs*40    | Frameshift        | This study      |
| 030043 | PK10325 | PKD1 | 40 | c.11316_11317insA  | p.Ala3773Serfs*43    | Frameshift        | Audrezet, 2012  |
| 010096 | PK10311 | PKD1 | 40 | c.11327_11353del   | p.Phe3776_Gly3784del | In Frame deletion | Audrezet, 2012  |
| 091412 | PK10311 | PKD1 | 40 | c.11327_11353del   | p.Phe3776_Gly3784del | In Frame deletion | Audrezet, 2012  |
| 030081 | PK10510 | PKD1 | 40 | c.11340_11346dup   | p.Val3783Leufs*35    | Frameshift        | Audrezet, 2012  |
| 030038 | PK10369 | PKD1 | 40 | c.11344_11363dup   | p.His3789Thrfs*44    | Frameshift        | Audrezet, 2012  |
| 031170 | PK10869 | PKD1 | 40 | c.11354_11355ins14 | p.Trp3785*           | Frameshift        | This study      |
| 070004 | PK10645 | PKD1 | 40 | c.11379del         | p.Thr3794Argfs*32    | Frameshift        | Bogdanova, 2000 |
| 031076 | PK10781 | PKD1 | 40 | c.11379del         | p.Thr3794Argfs*32    | Frameshift        | Bogdanova, 2000 |
| 191785 | PK11316 | PKD1 | 40 | c.11386dup         | p.Ala3796Glyfs*20    | Frameshift        | This study      |
| 030080 | PK10509 | PKD1 | 40 | c.11397_11398del   | p.Pro3800Glyfs*15    | Frameshift        | Audrezet, 2012  |
| 010027 | PK10036 | PKD1 | 41 | c.11418dup         | p.Ser3807Valfs*9     | Frameshift        | Audrezet, 2012  |
| 010065 | PK10110 | PKD1 | 41 | c.11461C>T         | p.Gln3821*           | non sense         | Perrichot, 2000 |
| 010051 | PK10110 | PKD1 | 41 | c.11461C>T         | p.Gln3821*           | non sense         | Perrichot, 2000 |
| 010021 | PK10169 | PKD1 | 41 | c.11461C>T         | p.Gln3821*           | non sense         | Perrichot, 2000 |
| 010064 | PK10110 | PKD1 | 41 | c.11461C>T         | p.Gln3821*           | non sense         | Perrichot, 2000 |
| 010084 | PK10110 | PKD1 | 41 | c.11461C>T         | p.Gln3821*           | non sense         | Perrichot, 2000 |
| 010139 | PK10170 | PKD1 | 41 | c.11461C>T         | p.Gln3821*           | non sense         | Perrichot, 2000 |
| 010079 | PK10110 | PKD1 | 41 | c.11461C>T         | p.Gln3821*           | non sense         | Perrichot, 2000 |
| 010013 | PK10247 | PKD1 | 41 | c.11461C>T         | p.Gln3821*           | non sense         | Perrichot, 2000 |
| 010094 | PK10247 | PKD1 | 41 | c.11461C>T         | p.Gln3821*           | non sense         | Perrichot, 2000 |
| 010109 | PK10169 | PKD1 | 41 | c.11461C>T         | p.Gln3821*           | non sense         | Perrichot, 2000 |
| 020033 | PK10110 | PKD1 | 41 | c.11461C>T         | p.Gln3821*           | non sense         | Perrichot, 2000 |
| 010132 | PK10110 | PKD1 | 41 | c.11461C>T         | p.Gln3821*           | non sense         | Perrichot, 2000 |
| 010147 | PK10247 | PKD1 | 41 | c.11461C>T         | p.Gln3821*           | non sense         | Perrichot, 2000 |
| 010188 | PK10427 | PKD1 | 41 | c.11461C>T         | p.Gln3821*           | non sense         | Perrichot, 2000 |
| 120985 | PK10110 | PKD1 | 41 | c.11461C>T         | p.Gln3821*           | non sense         | Perrichot, 2000 |
| 191505 | PK11282 | PKD1 | 41 | c.11461C>T         | p.Gln3821*           | non sense         | Perrichot, 2000 |
| 041003 | PK10942 | PKD1 | 41 | c.11525G>A         | p.Trp3842*           | non sense         | Rossetti, 2007  |
| 020056 | PK10356 | PKD1 | 41 | c.11537+1G>T       |                      | Splicing          | Audrezet, 2012  |
| 020057 | PK10356 | PKD1 | 41 | c.11537+1G>T       |                      | Splicing          | Audrezet, 2012  |
| 020110 | PK10565 | PKD1 | 41 | c.11538-2A>G       |                      | Splicing          | Audrezet, 2012  |
| 010143 | PK10427 | PKD1 | 42 | c.11461C>T         | p.Gln3821*           | non sense         | Perrichot, 2000 |

|        |         |      |    |                  |                      |                   |                |
|--------|---------|------|----|------------------|----------------------|-------------------|----------------|
| 021449 | PK11269 | PKD1 | 42 | c.11554del       | p.Leu3852Trpfs*93    | Frameshift        | Rossetti, 2012 |
| 020035 | PK10324 | PKD1 | 42 | c.11630del       | p.Gly3877Alafs*68    | Frameshift        | Audrezet, 2012 |
| 021269 | PK10324 | PKD1 | 42 | c.11630del       | p.Gly3877Alafs*68    | Frameshift        | Audrezet, 2012 |
| 030056 | PK10401 | PKD1 | 42 | c.11633_11660dup | p.Phe3888Argfs*82    | Frameshift        | Audrezet, 2012 |
| 030047 | PK10348 | PKD1 | 42 | c.11648_11660dup | p.Phe3888Glnfs*77    | Frameshift        | Audrezet, 2012 |
| 020054 | PK10348 | PKD1 | 42 | c.11648_11660dup | p.Phe3888Glnfs*77    | Frameshift        | Audrezet, 2012 |
| 070002 | PK10348 | PKD1 | 42 | c.11648_11660dup | p.Phe3888Glnfs*77    | Frameshift        | Audrezet, 2012 |
| 070005 | PK10348 | PKD1 | 42 | c.11648_11660dup | p.Phe3888Glnfs*77    | Frameshift        | Audrezet, 2012 |
| 060003 | PK10348 | PKD1 | 42 | c.11648_11660dup | p.Phe3888Glnfs*77    | Frameshift        | Audrezet, 2012 |
| 060953 | PK10348 | PKD1 | 42 | c.11648_11660dup | p.Phe3888Glnfs*77    | Frameshift        | Audrezet, 2012 |
| 070917 | PK10348 | PKD1 | 42 | c.11648_11660dup | p.Phe3888Glnfs*77    | Frameshift        | Audrezet, 2012 |
| 020044 | PK10349 | PKD1 | 43 | c.11745del       | p.Val8916Trpfs*29    | Frameshift        | Audrezet, 2012 |
| 090008 | PK10304 | PKD1 | 43 | c.11773del       | p.Glu3925Lysfs*20    | Frameshift        | Audrezet, 2012 |
| 110010 | PK10304 | PKD1 | 43 | c.11773del       | p.Glu3925Lysfs*20    | Frameshift        | Audrezet, 2012 |
| 191712 | PK11418 | PKD1 | 43 | c.11792_11793dup | p.Arg3932Cysfs*14    | Frameshift        | This study     |
| 010043 | PK10267 | PKD1 | 43 | c.11802_11803del | p.Ala3935Leufs*25    | Frameshift        | Audrezet, 2012 |
| 191482 | PK11296 | PKD1 | 43 | c.11817G>A       | p.Trp3939*           | nonsense          | This study     |
| 030098 | PK10690 | PKD1 | 43 | c.11863C>T       | p.Gln3955*           | nonsense          | Rossetti, 2007 |
| 020153 | PK10717 | PKD1 | 43 | c.11863C>T       | p.Gln3955*           | nonsense          | Rossetti, 2007 |
| 021060 | PK10717 | PKD1 | 43 | c.11863C>T       | p.Gln3955*           | nonsense          | Rossetti, 2007 |
| 041008 | PK11096 | PKD1 | 43 | c.11863C>T       | p.Gln3955*           | nonsense          | Rossetti, 2007 |
| 130031 | PK10567 | PKD1 | 43 | c.11909_11926del | p.Pro3971_Ser3976del | In Frame deletion | Audrezet, 2012 |
| 131305 | PK10567 | PKD1 | 43 | c.11909_11926del | p.Pro3971_Ser3976del | In Frame deletion | Audrezet, 2012 |
| 191576 | PK11410 | PKD1 | 43 | c.11923_11942del | p.Trp3975Alafs*175   | Frameshift        | This study     |
| 030025 | PK10275 | PKD1 | 43 | c.11935C>T       | p.Gln3979*           | nonsense          | Hoelele, 2010  |
| 030077 | PK10538 | PKD1 | 43 | c.11935C>T       | p.Gln3979*           | nonsense          | Hoelele, 2010  |
| 020127 | PK10275 | PKD1 | 43 | c.11935C>T       | p.Gln3979*           | nonsense          | Hoelele, 2010  |
| 021191 | PK10911 | PKD1 | 43 | c.11935C>T       | p.Gln3979*           | nonsense          | Hoelele, 2010  |
| 031381 | PK10275 | PKD1 | 43 | c.11935C>T       | p.Gln3979*           | nonsense          | Hoelele, 2010  |
| 091592 | PK11413 | PKD1 | 43 | c.11935C>T       | p.Gln3979*           | nonsense          | Hoelele, 2010  |
| 090045 | PK10978 | PKD1 | 43 | c.11974del       | p.Ala3992Profs*47    | Frameshift        | This study     |
| 010052 | PK10255 | PKD1 | 43 | c.12004-2A>G     |                      | Splicing          | Audrezet, 2012 |
| 010048 | PK10255 | PKD1 | 43 | c.12004-2A>G     |                      | Splicing          | Audrezet, 2012 |
| 120025 | PK10255 | PKD1 | 43 | c.12004-2A>G     |                      | Splicing          | Audrezet, 2012 |
| 191570 | PK11452 | PKD1 | 43 | c.12004-2A>G     |                      | Splicing          | Audrezet, 2012 |
| 191753 | PK11452 | PKD1 | 43 | c.12004-2A>G     |                      | Splicing          | Audrezet, 2012 |
| 191767 | PK11452 | PKD1 | 43 | c.12004-2A>G     |                      | Splicing          | Audrezet, 2012 |
| 010086 | PK10258 | PKD1 | 44 | c.12010C>T       | p.Gln4004*           | nonsense          | Gao, 2006      |
| 010118 | PK10077 | PKD1 | 44 | c.12013C>T       | p.Gln4005*           | nonsense          | Iglesias, 1999 |
| 020066 | PK10408 | PKD1 | 44 | c.12013C>T       | p.Gln4005*           | nonsense          | Iglesias, 1999 |
| 091455 | PK11272 | PKD1 | 44 | c.12031C>T       | p.Gln4011*           | nonsense          | Daniells, 1998 |
| 010010 | PK10152 | PKD1 | 44 | c.12035G>A       | p.Trp4012*           | nonsense          | Audrezet, 2012 |
| 020040 | PK10354 | PKD1 | 44 | c.12035G>A       | p.Trp4012*           | nonsense          | Audrezet, 2012 |
| 010091 | PK10300 | PKD1 | 44 | c.12061C>T       | p.Arg4021*           | nonsense          | Turco, 1996    |
| 110019 | PK10300 | PKD1 | 44 | c.12061C>T       | p.Arg4021*           | nonsense          | Turco, 1996    |
| 021446 | PK11326 | PKD1 | 44 | c.12061C>T       | p.Arg4021*           | nonsense          | Turco, 1996    |
| 010050 | PK10174 | PKD1 | 44 | c.12085_12121del | p.Val4029Profs*157   | Frameshift        | Audrezet, 2012 |
| 020087 | PK10460 | PKD1 | 44 | c.12085_12121del | p.Val4029Profs*157   | Frameshift        | Audrezet, 2012 |
| 020114 | PK10174 | PKD1 | 44 | c.12085_12121del | p.Val4029Profs*157   | Frameshift        | Audrezet, 2012 |
| 080018 | PK10460 | PKD1 | 44 | c.12085_12121del | p.Val4029Profs*157   | Frameshift        | Audrezet, 2012 |
| 021217 | PK10981 | PKD1 | 44 | c.12124C>T       | p.Gln4042*           | nonsense          | turco, 1996    |

|        |         |      |    |                    |                                  |                     |                 |
|--------|---------|------|----|--------------------|----------------------------------|---------------------|-----------------|
| 191497 | PK11267 | PKD1 | 44 | c.12124C>T         | p.Gln4042*                       | nonsense            | Turco, 1996     |
| 191554 | PK11411 | PKD1 | 44 | c.12124C>T         | p.Gln4042*                       | nonsense            | Turco, 1996     |
| 090021 | PK10461 | PKD1 | 44 | c.12138+2T>G       |                                  | Splicing            | Audrezet, 2012  |
| 020006 | PK10307 | PKD1 | 44 | c.12139-1G>A       |                                  | Splicing            | Audrezet, 2012  |
| 130018 | PK10525 | PKD1 | 45 | c.12215_12216del   | p.Ser4072Tyrfs*84                | Frameshift          | Audrezet, 2012  |
| 020008 | PK10308 | PKD1 | 45 | c.12224_12225del   | p.Cys4075Serfs*81                | Frameshift          | Audrezet, 2012  |
| 021427 | PK11197 | PKD1 | 45 | c.12244_12245del   | p.Leu4082Valfs*74                | Frameshift          | This study      |
| 191561 | PK11314 | PKD1 | 45 | c.12253del         | p.Leu4085Cysfs*113               | Frameshift          | This study      |
| 031232 | PK10980 | PKD1 | 45 | c.12288G>A         | p.Trp4096*                       | nonsense            | Audrezet, 2012  |
| 021736 | PK11519 | PKD1 | 45 | c.12288G>A         | p.Trp4096*                       | nonsense            | Audrezet, 2012  |
| 021745 | PK11519 | PKD1 | 45 | c.12288G>A         | p.Trp4096*                       | nonsense            | Audrezet, 2012  |
| 021744 | PK11519 | PKD1 | 45 | c.12288G>A         | p.Trp4096*                       | nonsense            | Audrezet, 2012  |
| 060044 | PK10647 | PKD1 | 45 | c.12310_12313del   | p.Val4104Phefs*93                | Frameshift          | Audrezet, 2012  |
| 020064 | PK11145 | PKD1 | 45 | c.12419G>A         | p.Trp4140*                       | nonsense            | Perrichot, 1999 |
| 090022 | PK10119 | PKD1 | 45 | c.12420G>A         | p.Trp4140*                       | nonsense            | Perrichot, 1999 |
| 010137 | PK10485 | PKD1 | 45 | c.12421dup         | p.Met4141Asnfs*16                | Frameshift          | Audrezet, 2012  |
| 010866 | PK10485 | PKD1 | 45 | c.12421dup         | p.Met4141Asnfs*16                | Frameshift          | Audrezet, 2012  |
| 191864 | PK11544 | PKD1 | 45 | c.12440dup         | p.Gln4148Glyfs*9                 | Frameshift          | This study      |
| 191809 | PK11547 | PKD1 | 45 | c.12440dup         | p.Gln4148Glyfs*9                 | Frameshift          | This study      |
| 021209 | PK10944 | PKD1 | 45 | c.12445-2A>T       |                                  | Splicing            | This study      |
| 110012 | PK10607 | PKD1 | 46 | c.12445-5_12451dup | p.Arg4150_His4151insProGlnPheArg | In Frame insertion  | Audrezet, 2012  |
| 110017 | PK10607 | PKD1 | 46 | c.12445-5_12451dup | p.Arg4150_His4151insProGlnPheArg | In Frame insertion  | Audrezet, 2012  |
| 030089 | PK10539 | PKD1 | 46 | c.12530dup         | p.Pro4178Thrfs*32                | Frameshift          | Audrezet, 2012  |
| 070013 | PK10649 | PKD1 | 46 | c.12568dup         | p.Ser4190Phefs*20                | Frameshift          | Audrezet, 2012  |
| 030073 | PK10477 | PKD1 | 46 | c.12577_12580dup   | p.Leu4194Profs*17                | Frameshift          | Audrezet, 2012  |
| 120011 | PK10540 | PKD1 | 46 | c.12605_12632del   | p.Arg4203Profs*146               | Frameshift          | Audrezet, 2012  |
| 191782 | PK11467 | PKD1 | 46 | c.12608_12635del   | p.Arg4203Profs*146               | Frameshift          | Audrezet, 2012  |
| 010046 | PK10253 | PKD1 | 46 | c.12624_12625del   | p.Cys4208*                       | Frameshift          | Audrezet, 2012  |
| 120004 | PK10253 | PKD1 | 46 | c.12624_12625del   | p.Cys4208*                       | Frameshift          | Audrezet, 2012  |
| 120003 | PK10253 | PKD1 | 46 | c.12624_12625del   | p.Cys4208*                       | Frameshift          | Audrezet, 2012  |
| 021210 | PK10961 | PKD1 | 46 | c.12640del         | p.Arg4214Alafs*144               | Frameshift          | This study      |
| 021270 | PK10961 | PKD1 | 46 | c.12640del         | p.Arg4214Alafs*144               | Frameshift          | This study      |
| 020113 | PK10566 | PKD1 | 46 | c.12691C>T         | p.Gln4231*                       | nonsense            | Stekrova, 2009  |
| 031163 | PK10842 | PKD1 | 46 | c.12721C>T         | p.Gln4241*                       | nonsense            | This study      |
| 030812 | PK10842 | PKD1 | 46 | c.12721C>T         | p.Gln4241*                       | nonsense            | This study      |
| 191723 | PK10842 | PKD1 | 46 | c.12721C>T         | p.Gln4241*                       | nonsense            | This study      |
| 091014 | PK10902 | PKD2 | 1  | c.12721C>T         |                                  | Large rearrangement | This study      |
| 010901 | PK10734 | PKD2 | 1  | c.169C>T           | p.Gln57*                         | nonsense            | This study      |
| 020121 | PK10664 | PKD2 | 1  | c.200_213del       | p.Pro67Argfs*20                  | Frameshift          | Audrezet, 2012  |
| 020027 | PK10418 | PKD2 | 1  | c.203dup           | p.Ala69Glyfs*23                  | Frameshift          | Torra, 1999     |
| 090018 | PK10420 | PKD2 | 1  | c.203dup           | p.Ala69Glyfs*23                  | Frameshift          | Torra, 1999     |
| 090033 | PK10569 | PKD2 | 1  | c.203dup           | p.Ala69Glyfs*23                  | Frameshift          | Torra, 1999     |
| 050017 | PK10753 | PKD2 | 1  | c.203dup           | p.Ala69Glyfs*23                  | Frameshift          | Torra, 1999     |
| 030943 | PK10968 | PKD2 | 1  | c.203dup           | p.Ala69Glyfs*23                  | Frameshift          | Torra, 1999     |
| 040904 | PK10771 | PKD2 | 1  | c.203dup           | p.Ala69Glyfs*23                  | Frameshift          | Torra, 1999     |
| 040906 | PK10771 | PKD2 | 1  | c.203dup           | p.Ala69Glyfs*23                  | Frameshift          | Torra, 1999     |
| 040907 | PK10771 | PKD2 | 1  | c.203dup           | p.Ala69Glyfs*23                  | Frameshift          | Torra, 1999     |
| 030979 | PK10837 | PKD2 | 1  | c.203dup           | p.Ala69Glyfs*23                  | Frameshift          | Torra, 1999     |
| 090970 | PK10420 | PKD2 | 1  | c.203dup           | p.Ala69Glyfs*23                  | Frameshift          | Torra, 1999     |
| 010860 | PK10420 | PKD2 | 1  | c.203dup           | p.Ala69Glyfs*23                  | Frameshift          | Torra, 1999     |
| 060957 | PK11129 | PKD2 | 1  | c.203dup           | p.Ala69Glyfs*23                  | Frameshift          | Torra, 1999     |

|        |         |      |   |                       |                    |                     |                  |
|--------|---------|------|---|-----------------------|--------------------|---------------------|------------------|
| 010875 | PK10420 | PKD2 | 1 | c.203dup              | p.Ala69Glys*23     | Frameshift          | Torna, 1999      |
| 091451 | PK11345 | PKD2 | 1 | c.203dup              | p.Ala69Glys*23     | Frameshift          | Torna, 1999      |
| 021445 | PK11364 | PKD2 | 1 | c.203dup              | p.Ala69Glys*23     | Frameshift          | Torna, 1999      |
| 021605 | PK11392 | PKD2 | 1 | c.203dup              | p.Ala69Glys*23     | Frameshift          | Torna, 1999      |
| 021110 | PK10963 | PKD2 | 1 | c.432C>G              | p.Tyr144*          | nonsense            | This study       |
| 140009 | PK10733 | PKD2 | 1 | c.478C>T              | p.Gln160*          | nonsense            | Reiterova, 2002  |
| 020067 | PK10499 | PKD2 | 1 | c.595+1G>A            |                    | Splicing            | Magstrom, 2003   |
| 030048 | PK10396 | PKD2 | 1 | c.595+1G>C            |                    | Splicing            | Audrezet, 2012   |
| 031464 | PK11457 | PKD2 | 1 | c.595+1G>C            |                    | Splicing            | Audrezet, 2012   |
| 191575 | PK11464 | PKD2 | 2 | c.619G>T              | p.Glu207*          | nonsense            | This study       |
| 021616 | PK11495 | PKD2 | 2 | c.704_709+2del        | p.Cys235_1le236del | Frameshift          | This study       |
| 020036 | PK10399 | PKD2 | 2 | c.709+1G>A            |                    | Splicing            | Veidhøisen, 1997 |
| 020051 | PK10437 | PKD2 | 3 | c.1095-2A>G           |                    | Splicing            | Audrezet, 2012   |
| 191563 | PK11456 | PKD2 | 3 | c.817_818del          | p.Leu273Valfs*29   | Frameshift          | Rossetti, 2003   |
| 030045 | PK10377 | PKD2 | 3 | c.843+1G>A            |                    | Splicing            | Audrezet, 2012   |
| 031166 | PK10377 | PKD2 | 3 | c.843+1G>A            |                    | Splicing            | Audrezet, 2012   |
| 010166 | PK10669 | PKD2 | 3 | g.88952830_g.89050619 | p.Arg561*          | Large rearrangement | Audrezet, 2012   |
| 010844 | PK11052 | PKD2 | 3 | g.88952830_g.89050619 |                    | Large rearrangement | Audrezet, 2012   |
| 041007 | PK11293 | PKD2 | 3 | g.88952830_g.89050619 |                    | Large rearrangement | Audrezet, 2012   |
| 060932 | PK10470 | PKD2 | 4 | c.1081C>T             |                    | nonsense            | Chung, 2006      |
| 060936 | PK10825 | PKD2 | 4 | c.1081C>T             | p.Arg361*          | nonsense            | Chung, 2006      |
| 010837 | PK10570 | PKD2 | 4 | c.1094+1G>A           |                    | Splicing            | Chung, 2006      |
| 030817 | PK10682 | PKD2 | 4 | c.1094+1G>C           |                    | Splicing            | Yu, 2011         |
| 021258 | PK11061 | PKD2 | 4 | c.12424G>A            | p.Gly414Ser        | nonsense            | Rossetti, 2007   |
| 021608 | PK11458 | PKD2 | 4 | c.866del              | p.Asp289Valfs*28   | Frameshift          | This study       |
| 110008 | PK10471 | PKD2 | 4 | c.958C>T              | p.Arg320*          | nonsense            | Reynolds, 1999   |
| 040020 | PK10554 | PKD2 | 4 | c.958C>T              | p.Arg320*          | nonsense            | Reynolds, 1999   |
| 090024 | PK10628 | PKD2 | 4 | c.958C>T              | p.Arg320*          | nonsense            | Reynolds, 1999   |
| 030804 | PK10680 | PKD2 | 4 | c.973C>T              | p.Arg325*          | nonsense            | Rossetti, 2007   |
| 030947 | PK10772 | PKD2 | 4 | c.973C>T              | p.Arg325*          | nonsense            | Rossetti, 2007   |
| 031284 | PK11131 | PKD2 | 4 | c.973C>T              | p.Arg325*          | nonsense            | Rossetti, 2007   |
| 191492 | PK11598 | PKD2 | 4 | c.973C>T              | p.Arg325*          | nonsense            | Rossetti, 2007   |
| 040001 | PK10371 | PKD2 | 5 | c.1140G>A             | p.Trp380*          | nonsense            | Audrezet, 2012   |
| 040002 | PK10371 | PKD2 | 5 | c.1140G>A             | p.Trp380*          | nonsense            | Audrezet, 2012   |
| 040003 | PK10371 | PKD2 | 5 | c.1140G>A             | p.Trp380*          | nonsense            | Audrezet, 2012   |
| 030072 | PK10371 | PKD2 | 5 | c.1140G>A             | p.Trp380*          | nonsense            | Audrezet, 2012   |
| 041334 | PK11321 | PKD2 | 5 | c.1140G>A             | p.Trp380*          | nonsense            | Audrezet, 2012   |
| 041407 | PK10371 | PKD2 | 5 | c.1140G>A             | p.Trp380*          | nonsense            | Audrezet, 2012   |
| 030035 | PK10376 | PKD2 | 5 | c.1249C>T             | p.Arg417*          | nonsense            | Pei, 1998        |
| 030055 | PK10435 | PKD2 | 5 | c.1249C>T             | p.Arg417*          | nonsense            | Pei, 1998        |
| 030096 | PK10376 | PKD2 | 5 | c.1249C>T             | p.Arg417*          | nonsense            | Pei, 1998        |
| 110003 | PK10353 | PKD2 | 5 | c.1320+1G>A           |                    | Splicing            | Audrezet, 2012   |
| 110015 | PK10353 | PKD2 | 5 | c.1320+1G>A           |                    | Splicing            | Audrezet, 2012   |
| 161144 | PK10934 | PKD2 | 5 | c.1320+1G>A           |                    | Splicing            | Audrezet, 2012   |
| 180008 | PK11009 | PKD2 | 5 | c.1320+1G>A           |                    | Splicing            | Audrezet, 2012   |
| 141280 | PK11227 | PKD2 | 5 | c.1320+1G>A           |                    | Splicing            | Audrezet, 2012   |
| 030044 | PK10416 | PKD2 | 6 | c.1390C>T             | p.Arg464*          | nonsense            | Virbøy, 1997     |
| 020062 | PK10468 | PKD2 | 6 | c.1390C>T             | p.Arg464*          | nonsense            | Virbøy, 1997     |
| 130030 | PK10557 | PKD2 | 6 | c.1390C>T             | p.Arg464*          | nonsense            | Virbøy, 1997     |
| 030816 | PK10416 | PKD2 | 6 | c.1390C>T             | p.Arg464*          | nonsense            | Virbøy, 1997     |
| 021117 | PK10991 | PKD2 | 6 | c.1390C>T             | p.Arg464*          | nonsense            | Virbøy, 1997     |

|        |         |      |    |                       |                  |                     |                |
|--------|---------|------|----|-----------------------|------------------|---------------------|----------------|
| 021208 | PK10991 | PKD2 | 6  | c.1390C>T             | p.Arg464*        | nonsense            | Virbay, 1997   |
| 031239 | PK10416 | PKD2 | 6  | c.1390C>T             | p.Arg464*        | nonsense            | Virbay, 1997   |
| 010876 | PK10091 | PKD2 | 6  | c.1390C>T             | p.Arg464*        | nonsense            | Virbay, 1997   |
| 021447 | PK11395 | PKD2 | 6  | c.1390C>T             | p.Arg464*        | nonsense            | Virbay, 1997   |
| 021615 | PK11462 | PKD2 | 6  | c.1390C>T             | p.Arg464*        | nonsense            | Virbay, 1997   |
| 100012 | PK10486 | PKD2 | 6  | c.1391del             | p.Arg464Hisfs*50 | Frameshift          | Audrezet, 2012 |
| 010888 | PK11294 | PKD2 | 6  | c.1412dup             | p.Phe472Leufs*6  | Frameshift          | This study     |
| 211813 | PK11531 | PKD2 | 6  | c.1412dup             | p.Phe472Leufs*6  | Frameshift          | This study     |
| 211827 | PK11531 | PKD2 | 6  | c.1412dup             | p.Phe472Leufs*6  | Frameshift          | This study     |
| 021185 | PK10997 | PKD2 | 6  | c.1461T>A             | p.Tyr487*        | nonsense            | This study     |
| 091247 | PK11134 | PKD2 | 7  | c.1589C>A             | p.Ser530*        | nonsense            | This study     |
| 091345 | PK11134 | PKD2 | 7  | c.1589C>A             | p.Ser530*        | nonsense            | This study     |
| 021330 | PK11134 | PKD2 | 7  | c.1589C>A             | p.Ser530*        | nonsense            | This study     |
| 091800 | PK11134 | PKD2 | 7  | c.1589C>A             | p.Ser530*        | nonsense            | This study     |
| 090042 | PK10637 | PKD2 | 7  | c.1704dup             | p.Val569Cysfs*4  | Frameshift          | Audrezet, 2012 |
| 130027 | PK10556 | PKD2 | 7  | c.1717-2A>G           |                  | Splicing            | Audrezet, 2012 |
| 130042 | PK10658 | PKD2 | 7  | c.1717-2A>G           |                  | Splicing            | Audrezet, 2012 |
| 080016 | PK10658 | PKD2 | 7  | c.1717-2A>G           |                  | Splicing            | Audrezet, 2012 |
| 131049 | PK10556 | PKD2 | 7  | c.1717-2A>G           |                  | Splicing            | Audrezet, 2012 |
| 010161 | PK10099 | PKD2 | 8  | c.1774C>T             | p.Arg592*        | nonsense            | Audrezet, 2012 |
| 130052 | PK10712 | PKD2 | 8  | c.1774C>T             | p.Arg592*        | nonsense            | Audrezet, 2012 |
| 020149 | PK10726 | PKD2 | 8  | c.1811del             | p.Phe604Serfs*6  | Frameshift          | This study     |
| 021107 | PK10726 | PKD2 | 8  | c.1811del             | p.Phe604Serfs*6  | Frameshift          | This study     |
| 010053 | PK10234 | PKD2 | 8  | c.1837C>T             | p.Chr613*        | nonsense            | Audrezet, 2012 |
| 020019 | PK10370 | PKD2 | 9  | c.1960C>T             | p.Arg654*        | nonsense            | Irazabal, 2011 |
| 040008 | PK10394 | PKD2 | 9  | c.1960C>T             | p.Arg654*        | nonsense            | Irazabal, 2011 |
| 191498 | PK11399 | PKD2 | 9  | c.1960C>T             | p.Arg654*        | nonsense            | Irazabal, 2011 |
| 020074 | PK10464 | PKD2 | 9  | c.2019+2T>A           |                  | Splicing            | Audrezet, 2012 |
| 130016 | PK10639 | PKD2 | 9  | c.2019+2T>A           |                  | Splicing            | Audrezet, 2012 |
| 110013 | PK10640 | PKD2 | 9  | c.2019+2T>A           |                  | Splicing            | Audrezet, 2012 |
| 030110 | PK10641 | PKD2 | 9  | c.2019+2T>A           |                  | Splicing            | Audrezet, 2012 |
| 030113 | PK10676 | PKD2 | 9  | c.2019+2T>A           |                  | Splicing            | Audrezet, 2012 |
| 130921 | PK10714 | PKD2 | 9  | c.2019+2T>A           |                  | Splicing            | Audrezet, 2012 |
| 131046 | PK10932 | PKD2 | 9  | c.2019+2T>A           |                  | Splicing            | Audrezet, 2012 |
| 131307 | PK10676 | PKD2 | 9  | c.2019+2T>A           |                  | Splicing            | Audrezet, 2012 |
| 131391 | PK10464 | PKD2 | 9  | c.2019+2T>A           |                  | Splicing            | Audrezet, 2012 |
| 131396 | PK10639 | PKD2 | 9  | c.2019+2T>A           |                  | Splicing            | Audrezet, 2012 |
| 060029 | PK10154 | PKD2 | 10 | c.2059_2063del        | p.Val687Ilefs*2  | Frameshift          | Audrezet, 2012 |
| 010887 | PK10154 | PKD2 | 10 | c.2059_2063del        | p.Val687Ilefs*2  | Frameshift          | Audrezet, 2012 |
| 010107 | PK10378 | PKD2 | 10 | c.2077C>T             | p.Gln693*        | nonsense            | Audrezet, 2012 |
| 131310 | PK11241 | PKD2 | 10 | g.88983145_g.89011203 |                  | Large rearrangement | Audrezet, 2012 |
| 030026 | PK10301 | PKD2 | 10 | g.88983145_g.89011203 |                  | Large rearrangement | Audrezet, 2012 |
| 030042 | PK10532 | PKD2 | 10 | g.88983145_g.89011203 |                  | Large rearrangement | Audrezet, 2012 |
| 020046 | PK10531 | PKD2 | 10 | g.88983145_g.89011203 |                  | Large rearrangement | Audrezet, 2012 |
| 030060 | PK10532 | PKD2 | 10 | g.88983145_g.89011203 |                  | Large rearrangement | Audrezet, 2012 |
| 130001 | PK10536 | PKD2 | 10 | g.88983145_g.89011203 |                  | Large rearrangement | Audrezet, 2012 |
| 130004 | PK10610 | PKD2 | 10 | g.88983145_g.89011203 |                  | Large rearrangement | Audrezet, 2012 |
| 020080 | PK10531 | PKD2 | 10 | g.88983145_g.89011203 |                  | Large rearrangement | Audrezet, 2012 |
| 130002 | PK10611 | PKD2 | 10 | g.88983145_g.89011203 |                  | Large rearrangement | Audrezet, 2012 |
| 130007 | PK10612 | PKD2 | 10 | g.88983145_g.89011203 |                  | Large rearrangement | Audrezet, 2012 |
| 130010 | PK10613 | PKD2 | 10 | g.88983145_g.89011203 |                  | Large rearrangement | Audrezet, 2012 |

|        |         |      |    |                      |                     |                 |
|--------|---------|------|----|----------------------|---------------------|-----------------|
| I30024 | PK10651 | PKD2 | 10 | g-88983145.g-8901203 | Large rearrangement | Audrezet, 2012  |
| I30019 | PK10652 | PKD2 | 10 | g-88983145.g-8901203 | Large rearrangement | Audrezet, 2012  |
| 030083 | PK10652 | PKD2 | 10 | g-88983145.g-8901203 | Large rearrangement | Audrezet, 2012  |
| 030101 | PK10662 | PKD2 | 10 | g-88983145.g-8901203 | Large rearrangement | Audrezet, 2012  |
| I30033 | PK10880 | PKD2 | 10 | g-88983145.g-8901203 | Large rearrangement | Audrezet, 2012  |
| I30034 | PK10739 | PKD2 | 10 | g-88983145.g-8901203 | Large rearrangement | Audrezet, 2012  |
| 030099 | PK10881 | PKD2 | 10 | g-88983145.g-8901203 | Large rearrangement | Audrezet, 2012  |
| I30041 | PK10740 | PKD2 | 10 | g-88983145.g-8901203 | Large rearrangement | Audrezet, 2012  |
| I30047 | PK10613 | PKD2 | 10 | g-88983145.g-8901203 | Large rearrangement | Audrezet, 2012  |
| I30048 | PK10688 | PKD2 | 10 | g-88983145.g-8901203 | Large rearrangement | Audrezet, 2012  |
| I30014 | PK10611 | PKD2 | 10 | g-88983145.g-8901203 | Large rearrangement | Audrezet, 2012  |
| I30923 | PK10301 | PKD2 | 10 | g-88983145.g-8901203 | Large rearrangement | Audrezet, 2012  |
| I30925 | PK10301 | PKD2 | 10 | g-88983145.g-8901203 | Large rearrangement | Audrezet, 2012  |
| I30924 | PK10752 | PKD2 | 10 | g-88983145.g-8901203 | Large rearrangement | Audrezet, 2012  |
| I30927 | PK10301 | PKD2 | 10 | g-88983145.g-8901203 | Large rearrangement | Audrezet, 2012  |
| I30930 | PK10301 | PKD2 | 10 | g-88983145.g-8901203 | Large rearrangement | Audrezet, 2012  |
| I31042 | PK10536 | PKD2 | 10 | g-88983145.g-8901203 | Large rearrangement | Audrezet, 2012  |
| I31047 | PK10301 | PKD2 | 10 | g-88983145.g-8901203 | Large rearrangement | Audrezet, 2012  |
| I61142 | PK10301 | PKD2 | 10 | g-88983145.g-8901203 | Large rearrangement | Audrezet, 2012  |
| I60001 | PK10905 | PKD2 | 10 | g-88983145.g-8901203 | Large rearrangement | Audrezet, 2012  |
| I80997 | PK10947 | PKD2 | 10 | g-88983145.g-8901203 | Large rearrangement | Audrezet, 2012  |
| I31152 | PK10612 | PKD2 | 10 | g-88983145.g-8901203 | Large rearrangement | Audrezet, 2012  |
| 070915 | PK10955 | PKD2 | 10 | g-88983145.g-8901203 | Large rearrangement | Audrezet, 2012  |
| 031221 | PK10301 | PKD2 | 10 | g-88983145.g-8901203 | Large rearrangement | Audrezet, 2012  |
| I31158 | PK10301 | PKD2 | 10 | g-88983145.g-8901203 | Large rearrangement | Audrezet, 2012  |
| 021251 | PK10532 | PKD2 | 10 | g-88983145.g-8901203 | Large rearrangement | Audrezet, 2012  |
| I31304 | PK10880 | PKD2 | 10 | g-88983145.g-8901203 | Large rearrangement | Audrezet, 2012  |
| I31306 | PK11186 | PKD2 | 10 | g-88983145.g-8901203 | Large rearrangement | Audrezet, 2012  |
| 021328 | PK11188 | PKD2 | 10 | g-88983145.g-8901203 | Large rearrangement | Audrezet, 2012  |
| I31394 | PK11186 | PKD2 | 10 | g-88983145.g-8901203 | Large rearrangement | Audrezet, 2012  |
| I21532 | PK11365 | PKD2 | 10 | g-88983145.g-8901203 | Large rearrangement | Audrezet, 2012  |
| I21271 | PK11365 | PKD2 | 10 | g-88983145.g-8901203 | Large rearrangement | Audrezet, 2012  |
| 051136 | PK10752 | PKD2 | 10 | g-88983145.g-8901203 | Large rearrangement | Audrezet, 2012  |
| 031175 | PK11001 | PKD2 | 11 | c-2159del            | Frameshift          | Pei, 1998       |
| 031290 | PK11136 | PKD2 | 11 | c-2159del            | Frameshift          | Pei, 1998       |
| 031291 | PK10103 | PKD2 | 11 | c-2159del            | Frameshift          | Pei, 1998       |
| 091593 | PK10103 | PKD2 | 11 | c-2159del            | Frameshift          | Pei, 1998       |
| 010020 | PK10217 | PKD2 | 11 | c-2159dup            | Frameshift          | Pei, 1998       |
| 031171 | PK10998 | PKD2 | 11 | c-2159dup            | Frameshift          | Pei, 1998       |
| 031236 | PK10998 | PKD2 | 11 | c-2159dup            | Frameshift          | Pei, 1998       |
| 091457 | PK11401 | PKD2 | 11 | c-2159dup            | Frameshift          | Pei, 1998       |
| 191582 | PK11459 | PKD2 | 11 | c-2203A>T            | noise               | This study      |
| 021268 | PK11133 | PKD2 | 11 | c-2224C>T            | noise               | Mochizuki, 1996 |
| 021325 | PK11185 | PKD2 | 11 | c-2240+1G>A          | Splicing            | Tan, 2011       |
| 191708 | PK11463 | PKD2 | 11 | c-2240+1G>A          | Splicing            | Tan, 2011       |
| 091347 | PK11407 | PKD2 | 11 | c-2533C>T            | noise               | Torn, 2000      |
| 031287 | PK11132 | PKD2 | 12 | c-2266del            | Frameshift          | This study      |
| 020026 | PK10380 | PKD2 | 12 | c-2358+1G>A          | Splicing            | Rosetti, 2007   |
| 060028 | PK10624 | PKD2 | 13 | c-2407C>T            | noise               | Deltas, 2001    |
| 031028 | PK10815 | PKD2 | 13 | c-2407C>T            | noise               | Deltas, 2001    |
| 031388 | PK10815 | PKD2 | 13 | c-2407C>T            | noise               | Deltas, 2001    |

|        |         |      |    |                |                  |            |                |
|--------|---------|------|----|----------------|------------------|------------|----------------|
| 091796 | PK10624 | PKD2 | 13 | c.2407C>T      | p.Arg803*        | noise/ise  | Deltas, 2001   |
| 050006 | PK10351 | PKD2 | 13 | c.2419C>T      | p.Arg807*        | noise/ise  | Virbø, 1997    |
| 050003 | PK10351 | PKD2 | 13 | c.2419C>T      | p.Arg807*        | noise/ise  | Virbø, 1997    |
| 050007 | PK10352 | PKD2 | 13 | c.2419C>T      | p.Arg807*        | noise/ise  | Virbø, 1997    |
| 010105 | PK10398 | PKD2 | 13 | c.2419C>T      | p.Arg807*        | noise/ise  | Virbø, 1997    |
| 130009 | PK10553 | PKD2 | 13 | c.2419C>T      | p.Arg807*        | noise/ise  | Virbø, 1997    |
| 010168 | PK10351 | PKD2 | 13 | c.2419C>T      | p.Arg807*        | noise/ise  | Virbø, 1997    |
| 130023 | PK10625 | PKD2 | 13 | c.2419C>T      | p.Arg807*        | noise/ise  | Virbø, 1997    |
| 130037 | PK10636 | PKD2 | 13 | c.2419C>T      | p.Arg807*        | noise/ise  | Virbø, 1997    |
| 030807 | PK10677 | PKD2 | 13 | c.2419C>T      | p.Arg807*        | noise/ise  | Virbø, 1997    |
| 090036 | PK10668 | PKD2 | 13 | c.2419C>T      | p.Arg807*        | noise/ise  | Virbø, 1997    |
| 090044 | PK10668 | PKD2 | 13 | c.2419C>T      | p.Arg807*        | noise/ise  | Virbø, 1997    |
| 060042 | PK10711 | PKD2 | 13 | c.2419C>T      | p.Arg807*        | noise/ise  | Virbø, 1997    |
| 020160 | PK10774 | PKD2 | 13 | c.2419C>T      | p.Arg807*        | noise/ise  | Virbø, 1997    |
| 120983 | PK11082 | PKD2 | 13 | c.2419C>T      | p.Arg807*        | noise/ise  | Virbø, 1997    |
| 131156 | PK10711 | PKD2 | 13 | c.2419C>T      | p.Arg807*        | noise/ise  | Virbø, 1997    |
| 030015 | PK10417 | PKD2 | 13 | c.2508C>G      | p.Tyr836*        | noise/ise  | Audrezet, 2012 |
| 040004 | PK10417 | PKD2 | 13 | c.2508C>G      | p.Tyr836*        | noise/ise  | Audrezet, 2012 |
| 090004 | PK10382 | PKD2 | 13 | c.2508C>G      | p.Tyr836*        | noise/ise  | Audrezet, 2012 |
| 040010 | PK10417 | PKD2 | 13 | c.2508C>G      | p.Tyr836*        | noise/ise  | Audrezet, 2012 |
| 090006 | PK10419 | PKD2 | 13 | c.2508C>G      | p.Tyr836*        | noise/ise  | Audrezet, 2012 |
| 040015 | PK10417 | PKD2 | 13 | c.2508C>G      | p.Tyr836*        | noise/ise  | Audrezet, 2012 |
| 040011 | PK10417 | PKD2 | 13 | c.2508C>G      | p.Tyr836*        | noise/ise  | Audrezet, 2012 |
| 010163 | PK10382 | PKD2 | 13 | c.2508C>G      | p.Tyr836*        | noise/ise  | Audrezet, 2012 |
| 130050 | PK10417 | PKD2 | 13 | c.2508C>G      | p.Tyr836*        | noise/ise  | Audrezet, 2012 |
| 040909 | PK10382 | PKD2 | 13 | c.2508C>G      | p.Tyr836*        | noise/ise  | Audrezet, 2012 |
| 041331 | PK10417 | PKD2 | 13 | c.2508C>G      | p.Tyr836*        | noise/ise  | Audrezet, 2012 |
| 041408 | PK10417 | PKD2 | 13 | c.2508C>G      | p.Tyr836*        | noise/ise  | Audrezet, 2012 |
| 041409 | PK10417 | PKD2 | 13 | c.2508C>G      | p.Tyr836*        | noise/ise  | Audrezet, 2012 |
| 041522 | PK10417 | PKD2 | 13 | c.2508C>G      | p.Tyr836*        | noise/ise  | Audrezet, 2012 |
| 041523 | PK10417 | PKD2 | 13 | c.2508C>G      | p.Tyr836*        | noise/ise  | Audrezet, 2012 |
| 041526 | PK10417 | PKD2 | 13 | c.2508C>G      | p.Tyr836*        | noise/ise  | Audrezet, 2012 |
| 090965 | PK10999 | PKD2 | 14 | c.2527del      | p.Val843*        | Frameshift | This study     |
| 031378 | PK11319 | PKD2 | 14 | c.2527del      | p.Val843*        | Frameshift | This study     |
| 021733 | PK11530 | PKD2 | 14 | c.2527del      | p.Val843*        | Frameshift | This study     |
| 010900 | PK11319 | PKD2 | 14 | c.2527del      | p.Val843*        | Frameshift | This study     |
| 091343 | PK11184 | PKD2 | 14 | c.2528_2529del | p.Val843Glnfs*18 | Frameshift | This study     |
| 010121 | PK10188 | PKD2 | 14 | c.2533C>T      | p.Arg845*        | noise/ise  | Torn, 2000     |
| 090020 | PK10469 | PKD2 | 14 | c.2533C>T      | p.Arg845*        | noise/ise  | Torn, 2000     |
| 010144 | PK10555 | PKD2 | 14 | c.2533C>T      | p.Arg845*        | noise/ise  | Torn, 2000     |
| 010174 | PK10555 | PKD2 | 14 | c.2533C>T      | p.Arg845*        | noise/ise  | Torn, 2000     |
| 090027 | PK10629 | PKD2 | 14 | c.2533C>T      | p.Arg845*        | noise/ise  | Torn, 2000     |
| 010180 | PK10188 | PKD2 | 14 | c.2533C>T      | p.Arg845*        | noise/ise  | Torn, 2000     |
| 010181 | PK10188 | PKD2 | 14 | c.2533C>T      | p.Arg845*        | noise/ise  | Torn, 2000     |
| 010849 | PK10725 | PKD2 | 14 | c.2533C>T      | p.Arg845*        | noise/ise  | Torn, 2000     |
| 090964 | PK11000 | PKD2 | 14 | c.2533C>T      | p.Arg845*        | noise/ise  | Torn, 2000     |
| 010884 | PK11182 | PKD2 | 14 | c.2533C>T      | p.Arg845*        | noise/ise  | Torn, 2000     |
| 031297 | PK11189 | PKD2 | 14 | c.2533C>T      | p.Arg845*        | noise/ise  | Torn, 2000     |
| 021216 | PK11083 | PKD2 | 14 | c.2564del      | p.Ser855Thrfs*2  | Frameshift | This study     |
| 191516 | PK11393 | PKD2 | 14 | c.2568_2569del | p.Ser858Glnfs*3  | Frameshift | This study     |
| 191764 | PK11536 | PKD2 | 14 | c.2568_2569del | p.Ser858Glnfs*3  | Frameshift | This study     |

|        |         |      |    |                |                  |            |                |
|--------|---------|------|----|----------------|------------------|------------|----------------|
| 010183 | PK10298 | PKD2 | 14 | c.2614C>T      | p.Arg872*        | nonsense   | Reynolds, 1999 |
| 040910 | PK10993 | PKD2 | 14 | c.2614C>T      | p.Arg872*        | nonsense   | Reynolds, 1999 |
| 041406 | PK10993 | PKD2 | 14 | c.2614C>T      | p.Arg872*        | nonsense   | Reynolds, 1999 |
| 030109 | PK10638 | PKD2 | 15 | c.2845_2848del | p.Ser949Asnfs*49 | Frameshift | Audrezet, 2012 |
| 040007 | PK10393 | PKD2 | 15 | c.2905T>C      | p.*969Arget*13   | nonstop    | Audrezet, 2012 |
| 021188 | PK10393 | PKD2 | 15 | c.2905T>C      | p.*969Arget*13   | nonstop    | Audrezet, 2012 |



| Genkyst ID | Family ID | Gene | Exon/Intron | Nucleotide Change | Effect on Protein | Mutation type     | Score | Reference            |
|------------|-----------|------|-------------|-------------------|-------------------|-------------------|-------|----------------------|
| 010111     | PK10303   | PKD1 | 1           | c.153C>G          | p.Cys51Trp        | Missense          | 16    | Audrezet, 2012       |
| 021737     | PK11522   | PKD1 | 1           | c.153C>G          | p.Cys51Trp        | Missense          | 16    | Audrezet, 2012       |
| 031240     | PK11109   | PKD1 | 1           | c.216-8C>G        |                   | Splicing          |       | This study           |
| 131400     | PK11109   | PKD1 | 1           | c.216-8C>G        |                   | Splicing          |       | This study           |
| 070008     | PK10642   | PKD1 | 3           | c.359T>C          | p.Ile120Thr       | Missense          | 20    | Audrezet, 2012       |
| 070911     | PK10642   | PKD1 | 3           | c.359T>C          | p.Ile120Thr       | Missense          | 20    | Audrezet, 2012       |
| 010039     | PK10990   | PKD1 | 5           | c.548G>A          | p.Cys183Tyr       | Missense          | 20    | Audrezet, 2012       |
| 031389     | PK11257   | PKD1 | 5           | c.629G>A          | p.Cys210Tyr       | Missense          | 16    | Rossetti, 2012       |
| 051138     | PK11257   | PKD1 | 5           | c.629G>A          | p.Cys210Tyr       | Missense          | 16    | rossetti, 2012       |
| 040025     | PK10673   | PKD1 | 5           | c.695G>A          | p.Cys232Tyr       | Missense          | 14    | Comtec-Le Gall, 2013 |
| 010047     | PK10288   | PKD1 | 5           | c.974A>G          | p.Tyr325Cys       | Missense          | 14    | Rossetti, 2007       |
| 110001     | PK10289   | PKD1 | 5           | c.974A>G          | p.Tyr325Cys       | Missense          | 14    | Rossetti, 2007       |
| 030046     | PK10373   | PKD1 | 5           | c.974A>G          | p.Tyr325Cys       | Missense          | 14    | Rossetti, 2007       |
| 010149     | PK10288   | PKD1 | 5           | c.974A>G          | p.Tyr325Cys       | Missense          | 14    | Rossetti, 2007       |
| 130026     | PK10289   | PKD1 | 5           | c.974A>G          | p.Tyr325Cys       | Missense          | 14    | Rossetti, 2007       |
| 031023     | PK10373   | PKD1 | 5           | c.974A>G          | p.Tyr325Cys       | Missense          | 14    | Rossetti, 2007       |
| 051131     | PK10288   | PKD1 | 5           | c.974A>G          | p.Tyr325Cys       | Missense          | 14    | Rossetti, 2007       |
| 131301     | PK10289   | PKD1 | 5           | c.974A>G          | p.Tyr325Cys       | Missense          | 14    | Rossetti, 2007       |
| 191596     | PK11479   | PKD1 | 5           | c.974A>G          | p.Tyr325Cys       | Missense          | 14    | Rossetti, 2007       |
| 021354     | PK11202   | PKD1 | 6           | c.1295C>T         | p.Ala432Val       | Missense          | 19    | Rossetti, 2007       |
| 021739     | PK11202   | PKD1 | 6           | c.1295C>T         | p.Ala432Val       | Missense          | 19    | Rossetti, 2007       |
| 120981     | PK10719   | PKD1 | 7           | c.1544G>T         | p.Gly515Trp       | Missense          | 14    | Comtec-Le Gall, 2013 |
| 030010     | PK10939   | PKD1 | 7           | c.1605A>G         |                   | Splicing          |       | This study           |
| 030094     | PK10939   | PKD1 | 7           | c.1605A>G         |                   | Splicing          |       | This study           |
| 030814     | PK11067   | PKD1 | 7           | c.1605A>G         |                   | Splicing          |       | This study           |
| 021181     | PK10939   | PKD1 | 7           | c.1605A>G         |                   | Splicing          |       | This study           |
| 031285     | PK11067   | PKD1 | 7           | c.1605A>G         |                   | Splicing          |       | This study           |
| 031933     | PK11067   | PKD1 | 7           | c.1605A>G         |                   | Splicing          |       | This study           |
| 010170     | PK10138   | PKD1 | 11          | c.2180T>C         | p.Leu727Pro       | Missense          | 20    | Rossetti, 2007       |
| 020063     | PK10284   | PKD1 | 11          | c.2180T>C         | p.Leu727Pro       | Missense          | 20    | Rossetti, 2007       |
| 030066     | PK10404   | PKD1 | 11          | c.2180T>C         | p.Leu727Pro       | Missense          | 20    | Rossetti, 2007       |
| 130022     | PK10530   | PKD1 | 11          | c.2180T>C         | p.Leu727Pro       | Missense          | 20    | Rossetti, 2007       |
| 090040     | PK10586   | PKD1 | 11          | c.2180T>C         | p.Leu727Pro       | Missense          | 20    | Rossetti, 2007       |
| 010841     | PK10623   | PKD1 | 11          | c.2180T>C         | p.Leu727Pro       | Missense          | 20    | Rossetti, 2007       |
| 020155     | PK10742   | PKD1 | 11          | c.2180T>C         | p.Leu727Pro       | Missense          | 20    | Rossetti, 2007       |
| 021070     | PK10854   | PKD1 | 11          | c.2180T>C         | p.Leu727Pro       | Missense          | 20    | Rossetti, 2007       |
| 111096     | PK11302   | PKD1 | 11          | c.2180T>C         | p.Leu727Pro       | Missense          | 20    | Rossetti, 2007       |
| 191557     | PK11427   | PKD1 | 11          | c.2180T>C         | p.Leu727Pro       | Missense          | 20    | Rossetti, 2007       |
| 031230     | PK11043   | PKD1 | 11          | c.2534T>C         | p.Leu458Ser       | Missense          | 19    | Thomas, 1999         |
| 100004     | PK10964   | PKD1 | 12          | c.2985+8G>A       |                   | Splicing          |       | This study           |
| 021182     | PK10898   | PKD1 | 13          | c.3161+5G>T       |                   | Splicing          |       | This study           |
| 191553     | PK10898   | PKD1 | 13          | c.3161+5G>T       |                   | Splicing          |       | This study           |
| 030014     | PK10273   | PKD1 | 14          | c.3296-3C>G       |                   | Splicing          |       | Audrezet, 2012       |
| 031372     | PK10273   | PKD1 | 14          | c.3296-3C>G       |                   | Splicing          |       | Audrezet, 2012       |
| 031379     | PK10273   | PKD1 | 14          | c.3296-3C>G       |                   | Splicing          |       | Audrezet, 2012       |
| 020094     | PK10457   | PKD1 | 15          | c.3719_3721del    | p.Asn1240del      | In Frame deletion |       | Rossetti, 2003       |
| 021204     | PK10916   | PKD1 | 15          | c.3719_3721del    | p.Asn1240del      | In Frame deletion |       | Rossetti, 2003       |

|        |         |      |    |                     |                            |                   |                       |
|--------|---------|------|----|---------------------|----------------------------|-------------------|-----------------------|
| 010868 | PK10114 | PKD1 | 15 | c.3719_3721del      | p.Asn1240del               | In Frame deletion | Rossetti, 2003        |
| 010880 | PK10114 | PKD1 | 15 | c.3719_3721del      | p.Asn1240del               | In Frame deletion | Rossetti, 2003        |
| 091419 | PK11258 | PKD1 | 15 | c.4115_4117del      | p.Trp1372del               | In Frame deletion | This study            |
| 021118 | PK10851 | PKD1 | 15 | c.4349_4351del      | p.Asn1450del               | In Frame deletion | This study            |
| 031234 | PK10982 | PKD1 | 15 | c.4349_4351del      | p.Asn1450del               | In Frame deletion | This study            |
| 021365 | PK11213 | PKD1 | 15 | c.4981_4983del      | p.Asn1661del               | In Frame deletion | This study            |
| 021607 | PK11424 | PKD1 | 15 | c.5995G>A           | p.Gly1999Ser               | Missense          | Rossetti, 2007        |
| 020038 | PK10389 | PKD1 | 15 | c.5976_5978del      | p.Phe1992_Thr1993delinsLeu | In Frame deletion | Rossetti, 2001        |
| 020115 | PK10389 | PKD1 | 15 | c.5976_5978del      | p.Phe1992_Thr1993delinsLeu | In Frame deletion | Rossetti, 2001        |
| 030112 | PK10614 | PKD1 | 15 | c.6845A>G           | p.Tyr2282Cys               | Missense          | Audrezet, 2012        |
| 060016 | PK10335 | PKD1 | 15 | c.6778_6780del      | p.Ile2256del               | In Frame deletion | Rossetti, 2001        |
| 030052 | PK10425 | PKD1 | 15 | c.6778_6780del      | p.Ile2256del               | In Frame deletion | Rossetti, 2001        |
| 060025 | PK10335 | PKD1 | 15 | c.6778_6780del      | p.Ile2256del               | In Frame deletion | Rossetti, 2001        |
| 060045 | PK10335 | PKD1 | 15 | c.6778_6780del      | p.Ile2256del               | In Frame deletion | Rossetti, 2001        |
| 031373 | PK11201 | PKD1 | 15 | c.6778_6780del      | p.Ile2256del               | In Frame deletion | Rossetti, 2001        |
| 010033 | PK10256 | PKD1 | 15 | c.6892T>G           | p.Trp2298Gly               | Missense          | Audrezet, 2012        |
| 010035 | PK10286 | PKD1 | 16 | c.7066-17_7066-9del |                            | Splicing          | Audrezet, 2012        |
| 060039 | PK10286 | PKD1 | 16 | c.7066-17_7066-9del |                            | Splicing          | Audrezet, 2012        |
| 010141 | PK10136 | PKD1 | 17 | c.7136A>G           | p.Tyr2379Cys               | Missense          | Perrichot, 2000       |
| 090009 | PK10338 | PKD1 | 17 | c.7136A>G           | p.Tyr2379Cys               | Missense          | Perrichot, 2000       |
| 090038 | PK10338 | PKD1 | 17 | c.7136A>G           | p.Tyr2379Cys               | Missense          | Perrichot, 2000       |
| 010840 | PK10136 | PKD1 | 17 | c.7136A>G           | p.Tyr2379Cys               | Missense          | Perrichot, 2000       |
| 090030 | PK10338 | PKD1 | 17 | c.7136A>G           | p.Tyr2379Cys               | Missense          | Perrichot, 2000       |
| 010076 | PK10235 | PKD1 | 17 | c.7136A>G           | p.Tyr2379Cys               | Missense          | Perrichot, 2000       |
| 031286 | PK11088 | PKD1 | 17 | c.7209+4_7209+7del  |                            | Splicing          | Rossetti, 2007        |
| 021102 | PK10896 | PKD1 | 18 | c.7271C>T           | p.Thr2424Met               | Missense          | Yu, 2011              |
| 030084 | PK10505 | PKD1 | 18 | c.7300C>T           | p.Arg2434Trp               | Missense          | Hoefele, 2010         |
| 030949 | PK10706 | PKD1 | 18 | c.7300C>T           | p.Arg2434Trp               | Missense          | Hoefele, 2010         |
| 031224 | PK11017 | PKD1 | 18 | c.7300C>T           | p.Arg2434Trp               | Missense          | Hoefele, 2010         |
| 020053 | PK10441 | PKD1 | 18 | c.7426T>A           | p.Cys2476Ser               | Missense          | Audrezet, 2012        |
| 180006 | PK10922 | PKD1 | 18 | c.7426T>A           | p.Cys2476Ser               | Missense          | Audrezet, 2012        |
| 021183 | PK10922 | PKD1 | 18 | c.7426T>A           | p.Cys2476Ser               | Missense          | Audrezet, 2012        |
| 021260 | PK10922 | PKD1 | 18 | c.7426T>A           | p.Cys2476Ser               | Missense          | Audrezet, 2012        |
| 021748 | PK10441 | PKD1 | 18 | c.7426T>A           | p.Cys2476Ser               | Missense          | Audrezet, 2012        |
| 010082 | PK10134 | PKD1 | 18 | c.7483T>C           | p.Cys2495Arg               | Missense          | Audrezet, 2012        |
| 010087 | PK10296 | PKD1 | 19 | c.7546C>T           | p.Arg2516Cys               | Missense          | Rossetti, 2007        |
| 130928 | PK10831 | PKD1 | 19 | c.7546C>T           | p.Arg2516Cys               | Missense          | Rossetti, 2007        |
| 030088 | PK10474 | PKD1 | 19 | c.7543_7548del      | p.Arg2515_Arg2516del       | In Frame deletion | Audrezet, 2012        |
| 021443 | PK11277 | PKD1 | 19 | c.7546C>T           | p.Arg2516Cys               | Missense          | Rossetti, 2007        |
| 010179 | PK10225 | PKD1 | 23 | c.8299C>T           | p.Arg2767Cys               | Missense          | Garcia-Gonzales, 2007 |
| 010153 | PK10442 | PKD1 | 23 | c.8299C>T           | p.Arg2767Cys               | Missense          | Garcia-Gonzales, 2007 |
| 010131 | PK10189 | PKD1 | 23 | c.8300G>C           | p.Arg2767Pro               | Missense          | Audrezet, 2012        |
| 010154 | PK10189 | PKD1 | 23 | c.8300G>C           | p.Arg2767Pro               | Missense          | Audrezet, 2012        |
| 010157 | PK10189 | PKD1 | 23 | c.8300G>C           | p.Arg2767Pro               | Missense          | Audrezet, 2012        |
| 010881 | PK10189 | PKD1 | 23 | c.8300G>C           | p.Arg2767Pro               | Missense          | Audrezet, 2012        |
| 010896 | PK10189 | PKD1 | 23 | c.8300G>C           | p.Arg2767Pro               | Missense          | Audrezet, 2012        |
| 120007 | PK10385 | PKD1 | 23 | c.8309A>T           | p.Asn2770Ile               | Missense          | Audrezet, 2012        |
| 010150 | PK10130 | PKD1 | 23 | c.8311G>A           | p.Gln2771Lys               | Missense          | Rossetti, 2001        |
| 020048 | PK10366 | PKD1 | 23 | c.8311G>A           | p.Gln2771Lys               | Missense          | Rossetti, 2001        |
| 020095 | PK10366 | PKD1 | 23 | c.8311G>A           | p.Gln2771Lys               | Missense          | Rossetti, 2001        |
| 030103 | PK10546 | PKD1 | 23 | c.8311G>A           | p.Gln2771Lys               | Missense          | Rossetti, 2001        |

|         |         |      |    |                |                      |                   |    |                       |
|---------|---------|------|----|----------------|----------------------|-------------------|----|-----------------------|
| 020135  | PK10551 | PKD1 | 23 | c.831G>A       | p.Gln277Lys          | Missense          | 11 | Rossetti, 2001        |
| 090050  | PK10650 | PKD1 | 23 | c.831G>A       | p.Gln277Lys          | Missense          | 11 | Rossetti, 2001        |
| 090962  | PK10650 | PKD1 | 23 | c.831G>A       | p.Gln277Lys          | Missense          | 11 | Rossetti, 2001        |
| 090961  | PK10650 | PKD1 | 23 | c.831G>A       | p.Gln277Lys          | Missense          | 11 | Rossetti, 2001        |
| 050016  | PK10793 | PKD1 | 23 | c.831G>A       | p.Gln277Lys          | Missense          | 11 | Rossetti, 2001        |
| 131050  | PK10846 | PKD1 | 23 | c.831G>A       | p.Gln277Lys          | Missense          | 11 | Rossetti, 2001        |
| 191711  | PK11377 | PKD1 | 23 | c.831G>A       | p.Gln277Lys          | Missense          | 11 | Rossetti, 2001        |
| 020105  | PK10528 | PKD1 | 23 | c.844T>C       | p.Leu2816Pro         | Missense          | 18 | Rossetti, 2001        |
| 030029  | PK10292 | PKD1 | 23 | c.8557_8562del | p.Phe2853_Gln2854del | In Frame deletion |    | Audrezet, 2012        |
| 090015  | PK10495 | PKD1 | 23 | c.8557_8562del | p.Phe2853_Gln2854del | In Frame deletion |    | Audrezet, 2012        |
| 191779  | PK10495 | PKD1 | 23 | c.8557_8562del | p.Phe2853_Gln2854del | In Frame deletion |    | Audrezet, 2012        |
| 160004  | PK10596 | PKD1 | 23 | c.8791G>A      |                      | Splicing          |    | Garcia-Gonzales, 2007 |
| 010184  | PK10596 | PKD1 | 23 | c.8791G>A      |                      | Splicing          |    | Garcia-Gonzales, 2007 |
| 021066  | PK10801 | PKD1 | 25 | c.9202-3C>G    |                      | Splicing          | 20 | This study            |
| 030049  | PK10496 | PKD1 | 26 | c.9377C>T      | p.Thr3126Ile         | Missense          | 20 | Audrezet, 2012        |
| 120008  | PK10524 | PKD1 | 26 | c.9377C>T      | p.Thr3126Ile         | Missense          | 20 | Audrezet, 2012        |
| 060030  | PK10524 | PKD1 | 26 | c.9377C>T      | p.Thr3126Ile         | Missense          | 20 | Audrezet, 2012        |
| 021370  | PK10496 | PKD1 | 26 | c.9377C>T      | p.Thr3126Ile         | Missense          | 20 | Audrezet, 2012        |
| 191510  | PK11342 | PKD1 | 26 | c.9377C>T      | p.Thr3126Ile         | Missense          | 20 | Audrezet, 2012        |
| 130011  | PK10542 | PKD1 | 27 | c.9564_9566del | p.Asn3188del         | In Frame deletion |    | This study            |
| 030028  | PK10302 | PKD1 | 27 | c.9430G>T      | p.Gly3144Trp         | Missense          | 20 | Audrezet, 2012        |
| 130926  | PK10302 | PKD1 | 27 | c.9430G>T      | p.Gly3144Trp         | Missense          | 20 | Audrezet, 2012        |
| 191583  | PK11426 | PKD1 | 27 | c.9431G>A      | p.Gly3144Glu         | Missense          | 20 | Audrezet, 2012        |
| 191599  | PK11426 | PKD1 | 27 | c.9431G>A      | p.Gly3144Glu         | Missense          | 20 | Audrezet, 2012        |
| 020029  | PK10413 | PKD1 | 27 | c.9485G>A      | p.Arg3162Leu         | Missense          | 20 | Audrezet, 2012        |
| 021429  | PK10413 | PKD1 | 27 | c.9485G>T      | p.Arg3162Leu         | Missense          | 20 | Audrezet, 2012        |
| 021604  | PK10413 | PKD1 | 27 | c.9485G>T      | p.Arg3162Leu         | Missense          | 20 | Audrezet, 2012        |
| 191790  | PK11457 | PKD1 | 27 | c.9564_9566del | p.Asn3188del         | In Frame deletion |    | This study            |
| 020148  | PK10694 | PKD1 | 27 | c.9568G>A      |                      | Splicing          |    | This study            |
| 021106  | PK10782 | PKD1 | 28 | c.9924-3C>G    |                      | Splicing          |    | This study            |
| 021316  | PK10782 | PKD1 | 28 | c.9924-3C>G    |                      | Splicing          |    | This study            |
| PK10782 | PK10782 | PKD1 | 28 | c.9924-3C>G    |                      | Splicing          |    | This study            |
| 031080  | PK10802 | PKD1 | 29 | c.9859_9861del | p.Leu3287del         | In Frame deletion |    | This study            |
| 021734  | PK11508 | PKD1 | 29 | c.9859_9861del | p.Leu3287del         | In Frame deletion |    | Thongnopplakun, 2004  |
| 191806  | PK11546 | PKD1 | 29 | c.9859_9861del | p.Leu3287del         | In Frame deletion |    | Thongnopplakun, 2004  |
| 020001  | PK10278 | PKD1 | 29 | c.9924-3C>G    |                      | Splicing          |    | Audrezet, 2012        |
| 020020  | PK10278 | PKD1 | 29 | c.9924-3C>G    |                      | Splicing          |    | Audrezet, 2012        |
| 020072  | PK10278 | PKD1 | 29 | c.9924-3C>G    |                      | Splicing          |    | Audrezet, 2012        |
| 021062  | PK10782 | PKD1 | 29 | c.9924-3C>G    |                      | Splicing          |    | Audrezet, 2012        |
| 031079  | PK10787 | PKD1 | 29 | c.9924-3C>G    |                      | Splicing          |    | Audrezet, 2012        |
| 021109  | PK10278 | PKD1 | 29 | c.9924-3C>G    |                      | Splicing          |    | Audrezet, 2012        |
| 010029  | PK10173 | PKD1 | 37 | c.10951G>A     | p.Gly3651Ser         | Missense          | 17 | Zhang, 2005           |
| 020024  | PK10347 | PKD1 | 37 | c.10951G>A     | p.Gly3651Ser         | Missense          | 17 | Zhang, 2005           |
| 100014  | PK10578 | PKD1 | 37 | c.10951G>A     | p.Gly3651Ser         | Missense          | 17 | Zhang, 2005           |
| 120019  | PK10619 | PKD1 | 37 | c.10951G>A     | p.Gly3651Ser         | Missense          | 17 | Zhang, 2005           |
| 021254  | PK11025 | PKD1 | 39 | c.11176T>C     | p.Trp3726Arg         | Missense          | 18 | Reed, 2008            |
| 021255  | PK11025 | PKD1 | 39 | c.11176T>C     | p.Trp3726Arg         | Missense          | 18 | Reed, 2008            |
| 020052  | PK11050 | PKD1 | 37 | c.11007C>T     |                      | Splicing          |    | Rossetti, 2012        |
| 010108  | PK10329 | PKD1 | 37 | c.11017-10C>A  |                      | Splicing          |    | Perrichot, 1999       |
| 020163  | PK10751 | PKD1 | 39 | c.11157G>C     |                      | Splicing          |    | This study            |
| 021369  | PK10751 | PKD1 | 39 | c.11157G>C     |                      | Splicing          |    | This study            |

|        |         |      |    |                       |                      |                    |    |                       |
|--------|---------|------|----|-----------------------|----------------------|--------------------|----|-----------------------|
| 020021 | PK10584 | PKD1 | 39 | c.11204T>A            | p.Val3735Asp         | Missense           | 18 | Comec-Le Gall, 2013   |
| 020025 | PK10357 | PKD1 | 39 | c.11249_11250delinsAA | p.Arg3750Gln         | Missense           | 20 | Audrezet, 2012        |
| 030091 | PK10512 | PKD1 | 39 | c.11204_11209del      | p.Val3735_His3736del | In Frame deletion  |    | Audrezet, 2012        |
| 030104 | PK10512 | PKD1 | 39 | c.11204_11209del      | p.Val3735_His3736del | In Frame deletion  |    | Audrezet, 2012        |
| 030948 | PK10696 | PKD1 | 39 | c.11204_11209del      | p.Val3735_His3736del | In Frame deletion  |    | Audrezet, 2012        |
| 031479 | PK10512 | PKD1 | 39 | c.11204_11209del      | p.Val3735_His3736del | In Frame deletion  |    | Audrezet, 2012        |
| 021067 | PK10800 | PKD1 | 39 | c.11249_11250delinsAA | p.Arg3750Gln         | Missense           | 20 | Audrezet, 2012        |
| 191512 | PK11266 | PKD1 | 39 | c.11249_11250delinsAA | p.Arg3750Gln         | Missense           | 20 | Audrezet, 2012        |
| 191515 | PK10363 | PKD1 | 39 | c.11249_11250delinsAA | p.Arg3750Gln         | Missense           | 20 | Audrezet, 2012        |
| 010177 | PK10196 | PKD1 | 39 | c.11251C>A            | p.Gln3751Lys         | Missense           | 16 | Audrezet, 2012        |
| 010041 | PK10196 | PKD1 | 39 | c.11251C>A            | p.Gln3751Lys         | Missense           | 16 | Audrezet, 2012        |
| 010031 | PK10196 | PKD1 | 39 | c.11251C>A            | p.Gln3751Lys         | Missense           | 16 | Audrezet, 2012        |
| 020031 | PK10339 | PKD1 | 39 | c.11257C>T            | p.Arg3753Trp         | Missense           | 20 | Tsuchiya, 2001        |
| 020032 | PK10339 | PKD1 | 39 | c.11257C>T            | p.Arg3753Trp         | Missense           | 20 | Tsuchiya, 2001        |
| 030054 | PK11053 | PKD1 | 39 | c.11257C>T            | p.Arg3753Trp         | Missense           | 20 | Tsuchiya, 2001        |
| 020131 | PK10608 | PKD1 | 39 | c.11257C>T            | p.Arg3753Trp         | Missense           | 20 | Tsuchiya, 2001        |
| 021314 | PK10608 | PKD1 | 39 | c.11257C>T            | p.Arg3753Trp         | Missense           | 20 | Tsuchiya, 2001        |
| 010886 | PK10167 | PKD1 | 39 | c.11258G>A            | p.Arg3753Gln         | Missense           | 15 | Rossetti, 2007        |
| 131044 | PK10818 | PKD1 | 39 | c.11258G>A            | p.Arg3753Gln         | Missense           | 15 | Rossetti, 2007        |
| 021218 | PK10984 | PKD1 | 41 | c.11451_11453dup      | p.Gly3818dup         | In Frame insertion |    | This study            |
| 010071 | PK10319 | PKD1 | 42 | c.11614C>C            | p.Gln3872Gln         | Missense           | 19 | Audrezet, 2012        |
| 020002 | PK10327 | PKD1 | 42 | c.11614G>C            | p.Gln3872Gln         | Missense           | 19 | Audrezet, 2012        |
| 021364 | PK10327 | PKD1 | 42 | c.11614G>C            | p.Gln3872Gln         | Missense           | 14 | Audrezet, 2012        |
| 090041 | PK10145 | PKD1 | 43 | c.11980_11988dup      | p.Phe3996_Leu3998dup | In Frame insertion |    | This study            |
| 191562 | PK10145 | PKD1 | 43 | c.11980_11988dup      | p.Phe3996_Leu3998dup | In Frame insertion |    | This study            |
| 191765 | PK10145 | PKD1 | 43 | c.11980_11988dup      | p.Phe3996_Leu3998dup | In Frame insertion |    | This study            |
| 010001 | PK10080 | PKD1 | 45 | c.12388_12390del      | p.Val4130del         | In Frame deletion  |    | Garcia-Gonzales, 2007 |
| 091013 | PK10776 | PKD1 | 45 | c.12391_12393del      | p.Gln4131del         | In Frame deletion  |    | This study            |
| 010112 | PK10285 | PKD1 | 46 | c.12448C>T            | p.Arg4150Cys         | Missense           | 20 | Garcia-Gonzales, 2007 |
| 060008 | PK10444 | PKD1 | 46 | c.12448C>T            | p.Arg4150Cys         | Missense           | 20 | Garcia-Gonzales, 2007 |
| 020093 | PK10575 | PKD1 | 46 | c.12448C>T            | p.Arg4150Cys         | Missense           | 20 | Garcia-Gonzales, 2007 |
| 120012 | PK10444 | PKD1 | 46 | c.12448C>T            | p.Arg4150Cys         | Missense           | 20 | Garcia-Gonzales, 2007 |
| 020168 | PK10575 | PKD1 | 46 | c.12448C>T            | p.Arg4150Cys         | Missense           | 20 | Garcia-Gonzales, 2007 |
| 010892 | PK11251 | PKD1 | 46 | c.12448C>T            | p.Arg4150Cys         | Missense           | 20 | Garcia-Gonzalez, 2007 |
| 121531 | PK11408 | PKD2 | 4  | c.1034A>G             | p.Tyr345Cys          | Missense           | 16 | Yu, 2011              |
| 010185 | PK10233 | PKD2 | 4  | c.1094+3_1094+6del    |                      | Splicing           |    | Magistri, 2003        |
| 010857 | PK10233 | PKD2 | 4  | c.1094+3_1094+6del    |                      | Splicing           |    | Magistri, 2003        |
| 031074 | PK10832 | PKD2 | 4  | c.1094+3_1094+6del    |                      | Splicing           |    | Magistri, 2003        |
| 170003 | PK11099 | PKD2 | 4  | c.965G>A              | p.Arg322Gln          | Missense           | 20 | Peltola, 2005         |
| 070007 | PK10935 | PKD2 | 4  | c.1031G>A             | p.Cys344Tyr          | Missense           | 20 | This study            |
| 021262 | PK11152 | PKD2 | 4  | c.964C>T              | p.Arg322Trp          | Missense           | 20 | Reiterova, 2002       |
| 141276 | PK11183 | PKD2 | 4  | c.964C>T              | p.Arg322Trp          | Missense           | 20 | Reiterova, 2002       |
| 091454 | PK11529 | PKD2 | 4  | c.964C>T              | p.Arg322Trp          | Missense           | 20 | Reiterova, 2002       |
| 021108 | PK10903 | PKD2 | 4  | c.965G>A              | p.Arg322Gln          | Missense           | 12 | Peltola, 2005         |
| 021732 | PK10903 | PKD2 | 4  | c.965G>A              | p.Arg322Gln          | Missense           | 12 | Peltola, 2005         |
| 021265 | PK11149 | PKD2 | 5  | c.1320+5T>G           |                      | Splicing           |    | This study            |
| 130032 | PK10630 | PKD2 | 6  | c.1548+3A>C           |                      | Splicing           |    | Audrezet, 2012        |
| 090827 | PK10715 | PKD2 | 11 | c.2208_2213del        | p.Leu736_Asn737del   | In Frame deletion  |    | Stekrova, 2004        |
| 131871 | PK11455 | PKD2 | 14 | c.2657A>G             | p.Asp86Gly           | Missense           | 18 | Reynolds, 1999        |

| Genkyst ID | Family ID | Gene | Exon/Intron | Nucleotide Change | Effect on Protein | Mutation type | Score | Reference             |
|------------|-----------|------|-------------|-------------------|-------------------|---------------|-------|-----------------------|
| 021195     | PK11008   | PKD1 | 1           | c.116G>T          | p.Cys59Phe        | Missense      | 16    | This study            |
| 021219     | PK11008   | PKD1 | 1           | c.116G>T          | p.Cys59Phe        | Missense      | 16    | This study            |
| 021252     | PK11008   | PKD1 | 1           | c.116G>T          | p.Cys59Phe        | Missense      | 16    | This study            |
| 191507     | PK11420   | PKD1 | 2           | c.230A>G          | p.Asn77Ser        | Missense      | 12    | This study            |
| 191713     | PK11498   | PKD1 | 2           | c.230A>G          | p.Asn77Ser        | Missense      | 12    | This study            |
| 010113     | PK10242   | PKD1 | 4           | c.385T>C          | p.Cys129Arg       | Missense      | 20    | Audrezet, 2012        |
| 070003     | PK10526   | PKD1 | 4           | c.464G>A          | p.Cys155Tyr       | Missense      | 20    | Audrezet, 2012        |
| 191706     | PK11477   | PKD1 | 4           | c.464G>A          | p.Cys155Tyr       | Missense      | 20    | Audrezet, 2012        |
| 010873     | PK11016   | PKD1 | 5           | c.1088G>A         | p.Cys363Tyr       | Missense      | 14    | This study            |
| 061124     | PK11016   | PKD1 | 5           | c.1088G>A         | p.Cys363Tyr       | Missense      | 14    | This study            |
| 120018     | PK10635   | PKD1 | 5           | c.674C>T          | p.Ser225Leu       | Missense      | 6     | Comes-Le Gall, 2013   |
| 021115     | PK10953   | PKD1 | 6           | c.1379T>A         | p.Val460Asp       | Missense      | 15    | This study            |
| 020125     | PK10653   | PKD1 | 7           | c.1576C>G         | p.His526Asp       | Missense      | 20    | Audrezet, 2012        |
| 010093     | PK10243   | PKD1 | 9           | c.1730T>G         | p.Val577Gly       | Missense      | 17    | Audrezet, 2012        |
| 031283     | PK11062   | PKD1 | 9           | c.1826T>G         | p.Val609Gly       | Missense      | 17    | Rossetti, 2007        |
| 010133     | PK10915   | PKD1 | 9           | c.1831C>T         | p.Arg611Trp       | Missense      | 20    | Garcia-Gonzales, 2007 |
| 020085     | PK10508   | PKD1 | 9           | c.1831C>T         | p.Arg611Trp       | Missense      | 20    | Garcia-Gonzales, 2007 |
| 080005     | PK10534   | PKD1 | 9           | c.1831C>T         | p.Arg611Trp       | Missense      | 20    | Garcia-Gonzales, 2007 |
| 020158     | PK10508   | PKD1 | 9           | c.1831C>T         | p.Arg611Trp       | Missense      | 20    | Garcia-Gonzales, 2007 |
| 010836     | PK10616   | PKD1 | 10          | c.2053G>A         | p.Glu685Lys       | Missense      | 17    | Audrezet, 2012        |
| 020018     | PK10332   | PKD1 | 10          | c.2092T>G         | p.Tyr698Asp       | Missense      | 20    | Audrezet, 2012        |
| 020055     | PK10440   | PKD1 | 10          | c.2092T>G         | p.Tyr698Asp       | Missense      | 20    | Audrezet, 2012        |
| 020301     | PK10440   | PKD1 | 10          | c.2092T>G         | p.Tyr698Asp       | Missense      | 20    | Audrezet, 2012        |
| 191751     | PK10440   | PKD1 | 10          | c.2092T>G         | p.Tyr698Asp       | Missense      | 20    | Audrezet, 2012        |
| 191865     | PK10440   | PKD1 | 10          | c.2092T>G         | p.Tyr698Asp       | Missense      | 20    | Audrezet, 2012        |
| 061121     | PK10904   | PKD1 | 11          | c.2387A>G         | p.Tyr796Cys       | Missense      | 20    | Rossetti, 2012        |
| 111093     | PK10951   | PKD1 | 11          | c.2485C>T         | p.Pro829Ser       | Missense      | 10    | This study            |
| 010005     | PK10205   | PKD1 | 15          | c.3617T>G         | p.Val1206Gly      | Missense      | 10    | Audrezet, 2012        |
| 010042     | PK10448   | PKD1 | 15          | c.3617T>G         | p.Val1206Gly      | Missense      | 10    | Audrezet, 2012        |
| 100013     | PK10579   | PKD1 | 15          | c.3617T>G         | p.Val1206Gly      | Missense      | 10    | Audrezet, 2012        |
| 010861     | PK10830   | PKD1 | 15          | c.3617T>G         | p.Val1206Gly      | Missense      | 10    | Audrezet, 2012        |
| 091243     | PK11106   | PKD1 | 15          | c.3617T>G         | p.Val1206Gly      | Missense      | 10    | Audrezet, 2012        |
| 010890     | PK11299   | PKD1 | 15          | c.3617T>G         | p.Val1206Gly      | Missense      | 10    | Audrezet, 2012        |
| 020116     | PK10581   | PKD1 | 15          | c.3722T>A         | p.Ile1241Asn      | Missense      | 14    | Audrezet, 2012        |
| 021362     | PK11220   | PKD1 | 15          | c.3872T>A         | p.Val1291Asp      | Missense      | 18    | This study            |
| 161146     | PK11015   | PKD1 | 15          | c.4076T>C         | p.Leu1359Pro      | Missense      | 16    | This study            |
| 030815     | PK10656   | PKD1 | 15          | c.4379T>G         | p.Val1460Gly      | Missense      | 20    | Audrezet, 2012        |
| 031030     | PK10656   | PKD1 | 15          | c.4379T>G         | p.Val1460Gly      | Missense      | 20    | Audrezet, 2012        |
| 010869     | PK10976   | PKD1 | 15          | c.4379T>G         | p.Val1460Gly      | Missense      | 20    | Audrezet, 2012        |
| 010871     | PK10976   | PKD1 | 15          | c.4379T>G         | p.Val1460Gly      | Missense      | 20    | Audrezet, 2012        |
| 100991     | PK10976   | PKD1 | 15          | c.4379T>G         | p.Val1460Gly      | Missense      | 20    | Audrezet, 2012        |
| 031086     | PK10860   | PKD1 | 15          | c.4385T>G         | p.Val1462Gly      | Missense      | 20    | This study            |
| 031376     | PK11218   | PKD1 | 15          | c.4462T>C         | p.Ser1488Pro      | Missense      | 16    | This study            |
| 021065     | PK10859   | PKD1 | 15          | c.5093G>C         | p.Arg1698Pro      | Missense      | 6     | This study            |
| 020118     | PK10633   | PKD1 | 15          | c.5180C>T         | p.Pro1727Leu      | Missense      | 20    | Audrezet, 2012        |
| 020123     | PK10633   | PKD1 | 15          | c.5180C>T         | p.Pro1727Leu      | Missense      | 20    | Audrezet, 2012        |
| 020164     | PK10812   | PKD1 | 15          | c.5180C>T         | p.Pro1727Leu      | Missense      | 20    | Audrezet, 2012        |

|        |         |      |    |                  |                        |                    |    |                         |
|--------|---------|------|----|------------------|------------------------|--------------------|----|-------------------------|
| 131154 | PK11026 | PKD1 | 15 | c.5180C>T        | p.Pro1727Leu           | Missense           | 20 | Audrezet, 2012          |
| 021321 | PK11143 | PKD1 | 15 | c.5180C>T        | p.Pro1727Leu           | Missense           | 20 | Audrezet, 2012          |
| 131397 | PK11026 | PKD1 | 15 | c.5180C>T        | p.Pro1727Leu           | Missense           | 20 | Audrezet, 2012          |
| 130929 | PK10785 | PKD1 | 15 | c.5936G>A        | p.Cys1979Trp           | Missense           | 8  | Cornec-Le Gall, 2013    |
| 030972 | PK10747 | PKD1 | 15 | c.5960G>A        | p.Gly1987Asp           | Missense           | 14 | Cornec-Le Gall, 2013    |
| 090966 | PK10746 | PKD1 | 15 | c.5983C>T        | p.Arg1995Cys           | Missense           | 10 | Cornec-Le Gall, 2013    |
| 010839 | PK10707 | PKD1 | 15 | c.5998T>C        | p.Ser2000Pro           | Missense           | 10 | Cornec-Le Gall, 2013    |
| 191589 | PK11478 | PKD1 | 15 | c.6082T>G        | p.Tyr2028Asp           | Missense           | 14 | This study              |
| 050005 | PK10763 | PKD1 | 15 | c.6086C>T        | p.Thr2029Met           | Missense           | 14 | This study              |
| 070001 | PK10705 | PKD1 | 15 | c.6382A>C        | p.Asn2128His           | Missense           | 14 | Cornec-Le Gall, 2013    |
| 020102 | PK10576 | PKD1 | 15 | c.6496C>T        | p.Arg2166Cys           | Missense           | 14 | Garcia-Gonzalez, 2007   |
| 010178 | PK10661 | PKD1 | 15 | c.6643C>T        | p.Arg2215Trp           | Missense           | 19 | Cornec-Le Gall, 2013    |
| 060939 | PK11249 | PKD1 | 15 | c.6643C>T        | p.Arg2215Trp           | Missense           | 19 | Cornec-Le Gall, 2013    |
| 031467 | PK11450 | PKD1 | 15 | c.6643C>T        | p.Arg2215Trp           | Missense           | 19 | Cornec-Le Gall, 2013    |
| 020151 | PK10720 | PKD1 | 15 | c.6647T>A        | p.Leu2216Gln           | Missense           | 14 | Cornec-Le Gall, 2013    |
| 140003 | PK10574 | PKD1 | 15 | c.6658C>T        | p.Arg2220Trp           | Missense           | 10 | Vujic, 2010             |
| 141405 | PK10574 | PKD1 | 15 | c.6658C>T        | p.Arg2220Trp           | Missense           | 10 | Vujic, 2010             |
| 010877 | PK11058 | PKD1 | 15 | c.6855C>A        | p.Asn2285Lys           | Missense           | 14 | This study              |
| 030945 | PK10703 | PKD1 | 15 | c.6892T>C        | p.Trp2298Arg           | Missense           | 18 | This study              |
| 031226 | PK10703 | PKD1 | 15 | c.6892T>C        | p.Trp2298Arg           | Missense           | 18 | This study              |
| 191520 | PK11359 | PKD1 | 15 | c.6892T>C        | p.Trp2298Arg           | Missense           | 18 | This study              |
| 060018 | PK10583 | PKD1 | 16 | c.6985C>T        | p.Arg2329Trp           | Missense           | 10 | Perrichot, 2000         |
| 010024 | PK10316 | PKD1 | 17 | c.7115C>G        | p.Ser2372Cys           | Missense           | 20 | Audrezet, 2012          |
| 010186 | PK10316 | PKD1 | 17 | c.7115C>G        | p.Ser2372Cys           | Missense           | 20 | Audrezet, 2012          |
| 010187 | PK10316 | PKD1 | 17 | c.7115C>G        | p.Ser2372Cys           | Missense           | 20 | Audrezet, 2012          |
| 010119 | PK10400 | PKD1 | 17 | c.7172G>A        | p.Gly2391Asp           | Missense           | 14 | Hoefele, 2010           |
| 191789 | PK11510 | PKD1 | 18 | c.7264A>C        | p.Thr2422Pro           | Missense           | 17 | This study              |
| 191844 | PK11510 | PKD1 | 18 | c.7264A>C        | p.Thr2422Pro           | Missense           | 17 | This study              |
| 191852 | PK11510 | PKD1 | 18 | c.7264A>C        | p.Thr2422Pro           | Missense           | 17 | This study              |
| 030097 | PK10606 | PKD1 | 18 | c.7376G>A        | p.Gly2459Asp           | Missense           | 14 | Audrezet, 2012          |
| 140008 | PK10882 | PKD1 | 18 | c.7222C>T        | p.Arg2408Cys           | Missense           | 10 | Phakdeekitcharoen, 2000 |
| 031078 | PK10841 | PKD1 | 19 | c.7622C>T        | p.Pro2541Leu           | Missense           | 17 | This study              |
| 130051 | PK11166 | PKD1 | 20 | c.7844T>C        | p.Leu2615Pro           | Missense           | 14 | This study              |
| 091242 | PK11040 | PKD1 | 23 | c.8207C>G        | p.Pro2736Arg           | Missense           | 14 | This study              |
| 031164 | PK10857 | PKD1 | 20 | c.7837_7839del   | p.Leu2615del           | In Frame deletion  |    | This study              |
| 020152 | PK10709 | PKD1 | 23 | c.8363C>G        | p.Ser2788Trp           | Missense           | 14 | This study              |
| 060934 | PK10675 | PKD1 | 23 | c.8537C>T        | p.Thr2846Ile           | Missense           | 20 | Cornec-Le Gall, 2013    |
| 061128 | PK10675 | PKD1 | 23 | c.8537C>T        | p.Thr2846Ile           | Missense           | 20 | Cornec-Le Gall, 2013    |
| 110006 | PK10125 | PKD1 | 23 | c.8475_8476msGCT | p.Leu2825_Ile2826msAla | In Frame insertion |    | Audrezet, 2012          |
| 030011 | PK10264 | PKD1 | 23 | c.8475_8476msGCT | p.Leu2825_Ile2826msAla | In Frame insertion |    | Audrezet, 2012          |
| 110002 | PK10264 | PKD1 | 23 | c.8475_8476msGCT | p.Leu2825_Ile2826msAla | In Frame insertion |    | Audrezet, 2012          |
| 110004 | PK10315 | PKD1 | 23 | c.8475_8476msGCT | p.Leu2825_Ile2826msAla | In Frame insertion |    | Audrezet, 2012          |
| 010130 | PK10315 | PKD1 | 23 | c.8475_8476msGCT | p.Leu2825_Ile2826msAla | In Frame insertion |    | Audrezet, 2012          |
| 110005 | PK10365 | PKD1 | 23 | c.8475_8476msGCT | p.Leu2825_Ile2826msAla | In Frame insertion |    | Audrezet, 2012          |
| 090011 | PK10315 | PKD1 | 23 | c.8475_8476msGCT | p.Leu2825_Ile2826msAla | In Frame insertion |    | Audrezet, 2012          |
| 090017 | PK10315 | PKD1 | 23 | c.8475_8476msGCT | p.Leu2825_Ile2826msAla | In Frame insertion |    | Audrezet, 2012          |
| 110007 | PK10264 | PKD1 | 23 | c.8475_8476msGCT | p.Leu2825_Ile2826msAla | In Frame insertion |    | Audrezet, 2012          |
| 110011 | PK10315 | PKD1 | 23 | c.8475_8476msGCT | p.Leu2825_Ile2826msAla | In Frame insertion |    | Audrezet, 2012          |
| 020112 | PK10501 | PKD1 | 23 | c.8475_8476msGCT | p.Leu2825_Ile2826msAla | In Frame insertion |    | Audrezet, 2012          |
| 110016 | PK10315 | PKD1 | 23 | c.8475_8476msGCT | p.Leu2825_Ile2826msAla | In Frame insertion |    | Audrezet, 2012          |
| 110018 | PK10156 | PKD1 | 23 | c.8475_8476msGCT | p.Leu2825_Ile2826msAla | In Frame insertion |    | Audrezet, 2012          |

|        |         |      |    |                  |                        |                    |            |                      |
|--------|---------|------|----|------------------|------------------------|--------------------|------------|----------------------|
| 050013 | PK10125 | PKD1 | 23 | c.8475_8476msGCT | p.Leu2825_ile2826msAla | In Frame insertion | 8          | Audrezet, 2012       |
| 021312 | PK11105 | PKD1 | 23 | c.8639C>T        | p.Ser2880Leu           | Missense           | This study |                      |
| 010100 | PK10708 | PKD1 | 24 | c.8933T>G        | p.Phe2978Cys           | Missense           | 20         | Cornec-Le Gall, 2013 |
| 010102 | PK10241 | PKD1 | 26 | c.9361G>A        | p.Glu3121Lys           | Missense           | 13         | Cornec-Le Gall, 2013 |
| 010172 | PK10529 | PKD1 | 26 | c.9361G>A        | p.Glu3121Lys           | Missense           | 13         | Cornec-Le Gall, 2013 |
| 141401 | PK11501 | PKD1 | 26 | c.9377C>G        | p.Thr3126Arg           | Missense           | 20         | This study           |
| 020165 | PK10748 | PKD1 | 26 | c.9395C>T        | p.Ser3132Leu           | Missense           | 20         | Cornec-Le Gall, 2013 |
| 191550 | PK11360 | PKD1 | 27 | c.9404C>T        | p.Thr3153Met           | Missense           | 20         | Bataille, 2011       |
| 191585 | PK11425 | PKD1 | 27 | c.9430G>A        | p.Gly3144Arg           | Missense           | 20         | This study           |
| 031081 | PK11005 | PKD1 | 27 | c.9499A>T        | p.Ile3167Phe           | Missense           | 12         | Rossetti, 2002       |
| 060037 | PK10654 | PKD1 | 27 | c.9543G>C        | p.Lys3181Asn           | Missense           | 17         | Audrezet, 2012       |
| 191761 | PK11499 | PKD1 | 27 | c.9551T>G        | p.Val3184Gly           | Missense           | 17         | This study           |
| 021212 | PK11013 | PKD1 | 28 | c.9569G>A        | p.Gly3190Glu           | Missense           | 20         | This study           |
| 031021 | PK10828 | PKD1 | 28 | c.9577C>T        | p.Pro3193Ser           | Missense           | 20         | Cornec-Le Gall, 2013 |
| 090014 | PK10038 | PKD1 | 28 | c.9578C>T        | p.Pro3193Leu           | Missense           | 20         | Perrichot, 2000      |
| 090034 | PK10038 | PKD1 | 28 | c.9578C>T        | p.Pro3193Leu           | Missense           | 20         | Perrichot, 2000      |
| 090010 | PK10038 | PKD1 | 28 | c.9578C>T        | p.Pro3193Leu           | Missense           | 20         | Perrichot, 2000      |
| 031084 | PK10894 | PKD1 | 28 | c.9644T>G        | p.Val3215Gly           | Missense           | 14         | This study           |
| 091020 | PK10894 | PKD1 | 28 | c.9644T>G        | p.Val3215Gly           | Missense           | 14         | This study           |
| 031238 | PK10894 | PKD1 | 28 | c.9644T>G        | p.Val3215Gly           | Missense           | 14         | This study           |
| 191862 | PK11525 | PKD1 | 28 | c.9694A>G        | p.Lys3232Glu           | Missense           | 13         | Rossetti, 2012       |
| 010090 | PK10362 | PKD1 | 29 | c.9829C>T homo   | p.Arg3277Cys homo      | Missense           | 16         | Rossetti, 2009       |
| 191794 | PK11509 | PKD1 | 29 | c.9829C>T homo   | p.Arg3277Cys homo      | Missense           | 16         | Rossetti, 2009       |
| 030802 | PK10655 | PKD1 | 29 | c.9898G>A        | p.Gly3300Arg           | Missense           | 16         | Cornec-Le Gall, 2013 |
| 130021 | PK10580 | PKD1 | 30 | c.10043G>A       | p.Arg3348Gln           | Missense           | 12         | non out              |
| 130053 | PK10580 | PKD1 | 30 | c.10043G>A       | p.Arg3348Gln           | Missense           | 12         | non out              |
| 020049 | PK10893 | PKD1 | 37 | c.10835C>A       | p.Ala3612Asp           | Missense           | 20         | This study           |
| 020065 | PK10893 | PKD1 | 37 | c.10835C>A       | p.Ala3612Asp           | Missense           | 20         | This study           |
| 021941 | PK10893 | PKD1 | 37 | c.10835C>A       | p.Ala3612Asp           | Missense           | 20         | This study           |
| 030007 | PK10326 | PKD1 | 37 | c.10958C>T       | p.Ala3653Val           | Missense           | 20         | Audrezet, 2012       |
| 030036 | PK10337 | PKD1 | 37 | c.10958C>T       | p.Ala3653Val           | Missense           | 20         | Audrezet, 2012       |
| 030808 | PK10326 | PKD1 | 37 | c.10958C>T       | p.Ala3653Val           | Missense           | 20         | Audrezet, 2012       |
| 090826 | PK10663 | PKD1 | 39 | c.11249G>A       | p.Arg3750Gln           | Missense           | 13         | Audrezet, 2012       |
| 090833 | PK10663 | PKD1 | 39 | c.11249G>A       | p.Arg3750Gln           | Missense           | 13         | Audrezet, 2012       |
| 020022 | PK10462 | PKD1 | 41 | c.11468T>C       | p.Leu3823Pro           | Missense           | 20         | Audrezet, 2012       |
| 031298 | PK11155 | PKD1 | 41 | c.11524T>G       | p.Trp3842Gly           | Missense           | 20         | This study           |
| 030941 | PK10692 | PKD1 | 42 | c.11711C>G       | p.Ser3904Trp           | Missense           | 14         | Cornec-Le Gall, 2013 |
| 020004 | PK10811 | PKD1 | 43 | c.11969T>G       | p.Leu3990Arg           | Missense           | 19         | This study           |
| 020012 | PK10811 | PKD1 | 43 | c.11969T>G       | p.Leu3990Arg           | Missense           | 19         | This study           |
| 021264 | PK10811 | PKD1 | 43 | c.11969T>G       | p.Leu3990Arg           | Missense           | 19         | This study           |
| 061123 | PK11107 | PKD1 | 44 | c.12051G>C       | p.Lys4017Asn           | Missense           | 16         | This study           |
| 191489 | PK11240 | PKD1 | 45 | c.12439A>G       | p.Lys4147Gly           | Missense           | 17         | This study           |
| 060023 | PK10604 | PKD1 | 46 | c.12826C>T       | p.Arg4276Trp           | Missense           | 16         | Badenas, 1999        |
| 060036 | PK10620 | PKD1 | 46 | c.12826C>T       | p.Arg4276Trp           | Missense           | 16         | Badenas, 1999        |
| 130012 | PK10648 | PKD1 | 46 | c.12826C>T       | p.Arg4276Trp           | Missense           | 16         | Badenas, 1999        |
| 060931 | PK10620 | PKD1 | 46 | c.12826C>T       | p.Arg4276Trp           | Missense           | 16         | Badenas, 1999        |
| 131157 | PK10648 | PKD1 | 46 | c.12826C>T       | p.Arg4276Trp           | Missense           | 16         | Badenas, 1999        |
| 131302 | PK10648 | PKD1 | 46 | c.12826C>T       | p.Arg4276Trp           | Missense           | 16         | Badenas, 1999        |
| 141277 | PK11157 | PKD1 | 46 | c.12826C>T       | p.Arg4276Trp           | Missense           | 16         | Badenas, 1999        |
| 191519 | PK11538 | PKD1 | 46 | c.12826C>T       | p.Arg4276Trp           | Missense           | 16         | Badenas, 1999        |

|        |         |      |    |           |             |          |    |            |
|--------|---------|------|----|-----------|-------------|----------|----|------------|
| 040023 | PK10724 | PKD2 | 3  | c.818T>C  | p.Leu273Pro | Missense | 19 | This study |
| 040903 | PK10724 | PKD2 | 3  | c.818T>C  | p.Leu273Pro | Missense | 19 | This study |
| 131151 | PK11003 | PKD2 | 5  | c.1242G>T | p.Trp14Cys  | Missense | 20 | This study |
| 130040 | PK10723 | PKD2 | 6  | c.1349G>A | p.Glu450Asp | Missense | 18 | This study |
| 031282 | PK11148 | PKD2 | 8  | c.1778G>A | p.Cys593Tyr | Missense | 15 | This study |
| 030085 | PK10577 | PKD2 | 9  | c.1991T>C | p.Phe664Ser | Missense | 19 | This study |
| 091249 | PK11151 | PKD2 | 14 | c.2546T>A | p.Met849Lys | Missense | 20 | This study |
